# Supplementary material for: Longitudinal study of use and cost of subacromial decompression surgery: the need for effective evaluation of surgical procedures to prevent overtreatment and wasted resources
Source: PubMed Central journal article supplement (PMC6719759; doi:10.1136/bmjopen-2019-030229), 2019-08-28
Supplement: bmjopen-2019-030229.draft_revisions.pdf [file bmjopen-2019-030229.draft_revisions.pdf]

# BMJ Open

BMJ Open is committed to open peer review. As part of this commitment we make the peer review history of every article we publish publicly available.

When an article is published we post the peer reviewers' comments and the authors' responses online. We also post the versions of the paper that were used during peer review. These are the versions that the peer review comments apply to.

The versions of the paper that follow are the versions that were submitted during the peer review process. They are not the versions of record or the final published versions. They should not be cited or distributed as the published version of this manuscript.

BMJ Open is an open access journal and the full, final, typeset and author-corrected version of record of the manuscript is available on our site with no access controls, subscription charges or pay-per-view fees (<http://bmjopen.bmj.com>).

If you have any questions on BMJ Open's open peer review process please email [info.bmjopen@bmj.com](mailto:info.bmjopen@bmj.com)

# BMJ Open

**A longitudinal study of use and cost of subacromial decompression surgery: the need for effective evaluation of surgical procedures to prevent overtreatment and wasted resources.**

|                               |                                                                                                                                                                                                                                                                                                                                                                                                                                                                                                                                                                             |
|-------------------------------|-----------------------------------------------------------------------------------------------------------------------------------------------------------------------------------------------------------------------------------------------------------------------------------------------------------------------------------------------------------------------------------------------------------------------------------------------------------------------------------------------------------------------------------------------------------------------------|
| Journal:                      | <i>BMJ Open</i>                                                                                                                                                                                                                                                                                                                                                                                                                                                                                                                                                             |
| Manuscript ID                 | bmjopen-2019-030229                                                                                                                                                                                                                                                                                                                                                                                                                                                                                                                                                         |
| Article Type:                 | Research                                                                                                                                                                                                                                                                                                                                                                                                                                                                                                                                                                    |
| Date Submitted by the Author: | 05-Mar-2019                                                                                                                                                                                                                                                                                                                                                                                                                                                                                                                                                                 |
| Complete List of Authors:     | Jones, Tim; University of Bristol, NIHR CLAHRC West<br>Carr, Andrew; University of Oxford, Nuffield Department of Orthopaedics, Rheumatology and Musculoskeletal Sciences<br>Beard, David; University of Oxford, Nuffield Department of Orthopaedics, Rheumatology and Musculoskeletal Sciences<br>Linton, Myles-Jay; University of Bristol, NIHR CLAHRC West<br>Rooshenas, Leila; University of Bristol, Population Health Sciences<br>Donovan, Jenny; University of Bristol, NIHR CLAHRC West<br>Hollingworth, William; University of Bristol, Population Health Sciences |
| Keywords:                     | subacromial decompression, shoulder surgery, England, commissioning, arthroscopy                                                                                                                                                                                                                                                                                                                                                                                                                                                                                            |
|                               |                                                                                                                                                                                                                                                                                                                                                                                                                                                                                                                                                                             |

SCHOLARONE™  
Manuscripts

1  
2  
3 1  
4  
5 2 **Title:** A longitudinal study of use and cost of subacromial decompression surgery: the need for  
6 3 effective evaluation of surgical procedures to prevent overtreatment and wasted resources.  
7  
8 4

9  
10 5 **Authors:** Tim Jones<sup>1,2</sup>, Andrew Carr<sup>3</sup>, David Beard<sup>3</sup>, Myles-Jay Linton<sup>1,2</sup>, Leila Rooshenas<sup>2</sup>, Jenny  
11 6 Donovan<sup>1,2</sup>, and William Hollingworth<sup>1,2</sup>  
12  
13 7

14 8  
15  
16  
17 9 <sup>1</sup> NIHR CLAHRC West, University Hospitals Bristol NHS Foundation Trust, Bristol, BS1 2NT, UK

18  
19 10 <sup>2</sup> Department of Population Health Sciences, Bristol Medical School, University of Bristol, BS8 2PS,  
20 11 UK

21  
22 12 <sup>3</sup> Nuffield Department of Orthopaedics, Rheumatology, and Musculoskeletal Sciences (NDORMS),  
23 13 NIHR Biomedical Research Centre, Botnar Research Centre, University of Oxford, Oxford, UK  
24  
25 14

26 15  
27  
28 16 **Corresponding author:**

29  
30 17 Tim Jones  
31 18 Senior Research Associate  
32 19 NIHR CLAHRC West,  
33 20 9<sup>th</sup> Floor Whitefriars,  
34 21 Lewin's Mead  
35 22 Bristol, BS1 2NT  
36 23 United Kingdom  
37 24

38 25 Tel: ++44 (0)117 342 1265

39 26 [Timothy.Jones@bristol.ac.uk](mailto:Timothy.Jones@bristol.ac.uk)  
40 27

41 28 **Word count [3,065]**  
42 29  
43 30

44 31 **Keywords:**

45 32 Subacromial decompression; arthroscopy; shoulder surgery; England; commissioning  
46 33  
47  
48  
49  
50  
51  
52  
53  
54  
55  
56  
57  
58  
59  
60

1  
2  
3 34 **ABSTRACT**  
4  
5 35  
6

7 36 **Objectives:** To illustrate the need for better evaluation of surgical procedures, we investigated the  
8  
9 37 use and cost of subacromial decompression in England over the last decade compared with other  
10  
11 38 countries and explored how this related to the conduct and outcomes of randomised, placebo-  
12  
13 39 controlled clinical trials.

14 40 **Design:** Longitudinal observational study using Hospital Episode Statistics linked to Payment by  
15  
16 41 Results tariffs in England, 2007/8-2016/17.

17  
18 42 **Setting:** Hospital care in England, Finland, New York State USA, Florida State USA, and Western  
19  
20 43 Australia.

21  
22 44 **Participants:** Patients with subacromial shoulder pain.

23  
24 45 **Interventions:** Subacromial decompression.

25  
26 46 **Main outcome measures:** National procedure rates, costs, and variation between clinical  
27  
28 47 commissioning groups (CCGs) in England.

29  
30 48 **Results:** Without robust clinical evidence, the use of subacromial decompression in England  
31  
32 49 increased by 91% from 15,112 procedures (30 per 100,000 population) in 2007/8, to 28,802  
33  
34 50 procedures (52 per 100,000 population) in 2016/17, costing over £125 million per year. Rates of use  
35  
36 51 of subacromial decompression are even higher internationally: Finland (131 per 100,000 in 2011),  
37  
38 52 Florida State (130 per 100,000 in 2007), Western Australia (115 per 100,000 in 2013), and New York  
39  
40 53 State (102 per 100,000 in 2006). Two randomised trials have recently (2018) shown the procedure to  
41  
42 54 be no more effective than placebo or conservative approaches. Health systems appear unable to  
43  
44 55 avoid the rapid widespread use of procedures of unknown effectiveness, and methods for ceasing  
45  
46 56 ineffective treatments are under-developed.

47  
48 57 **Conclusions:** Without good evidence, nearly 30,000 subacromial decompression procedures have  
49  
50 58 been commissioned each year in England, costing over £1 billion since 2007/8. Even higher rates of  
51  
52 59 procedures are carried out in countries with less regulated health systems. Randomised trials need  
53  
54 60 to be initiated before widespread adoption of promising operative procedures to avoid over-

1  
2  
3  
4  
5  
6  
7  
8  
9  
10  
11  
12  
13  
14  
15  
16  
17  
18  
19  
20  
21  
22  
23  
24  
25  
26  
27  
28  
29  
30  
31  
32  
33  
34  
35  
36  
37  
38  
39  
40  
41  
42  
43  
44  
45  
46  
47  
48  
49  
50  
51  
52  
53  
54  
55  
56  
57  
58  
59  
60

61 treatment and wasted resources, and methods to prevent or desist the use of ineffective procedures  
62 need to be expedited.

For peer review only

1  
2  
3 63 **ARTICLE SUMMARY**  
4  
5

6 64 **Strengths and Limitations of this Study**  
7  
8

- 9  
10 65 • Our study used a national, longitudinal dataset over a 10-year period covering all NHS  
11 secondary care providers in England, and private provision for NHS-funded patients.  
12 66  
13  
14 67 • Hospital Episode Statistics are linked to hospital payments, which is a strong incentive to  
15 provide complete data, and allowed us to explore costs of subacromial decompression in  
16 68  
17  
18 69 England.  
19  
20  
21 70 • We provide international comparisons of the use of subacromial decompression surgery.  
22  
23 71 • Our data are from 2007/08 onwards, so we under-estimate the amount spent on  
24 subacromial decompression prior to publication of major clinical trial results (CSAW and  
25 72  
26  
27 73 FIMPACT).  
28  
29  
30 74 • There may be additional factors influencing surgery rates which we have not controlled for  
31 (e.g. private health insurance coverage).  
32 75  
33  
34  
35  
36  
37  
38  
39  
40  
41  
42  
43  
44  
45  
46  
47  
48  
49  
50  
51  
52  
53  
54  
55  
56  
57  
58  
59  
60

## 76 INTRODUCTION

77 Health and social care services are 'straining at the seams' following increasing demand for services  
78 from an ageing population with more complex needs.<sup>1</sup> In England, over 200 Clinical Commissioning  
79 Groups (CCGs) have a budget to purchase health services for their local populations.<sup>2</sup> Hospital care  
80 currently accounts for 48.5% (£74 billion) of government health expenditure in the UK.<sup>3</sup> It is vital that  
81 commissioners make evidence-based decisions to maximise the effectiveness of this hospital care  
82 budget to benefit the overall health of the population.

83 Medicines must be licensed for use for a particular condition, requiring pharmaceutical companies  
84 to provide evidence of effectiveness from clinical trials to relevant agencies such as the Medicines  
85 and Healthcare products Regulatory Agency (MHRA) in the UK,<sup>4</sup> European Medicines Agency (EMA)  
86 in the EU, or the Food and Drug Administration (FDA) in the United States.<sup>5</sup> In the UK, the National  
87 Institute for Health and Care Excellence (NICE) also evaluates the cost-effectiveness of many  
88 medicines and does not recommend those which do not provide value. These regulatory processes  
89 have their limitations,<sup>6</sup> but require robust evidence for the introduction of new treatments. The  
90 quality of evidence required to introduce new surgical procedures is not as strict as for medicines,<sup>4,5</sup>  
91 in part because no specific product such as a drug or device is involved; it can be difficult to  
92 categorise procedures as 'new' rather than modifications; and outcomes may depend on the skill of  
93 the practitioner as well as the procedure itself.<sup>4</sup> Once introduced, use of procedures can spread by  
94 clinical consensus,<sup>5</sup> and established practice and clinical evidence often take many years to be  
95 updated.<sup>7,8</sup>

96 NHS England has recently commissioned a consultation regarding the use of 17 hospital procedures,<sup>9</sup>  
97 one of which is subacromial decompression for shoulder pain. Shoulder pain is common, with a  
98 lifetime prevalence of up to 66.7%<sup>10</sup>. Most of these cases (up to 70%) are related to rotator cuff  
99 tears or subacromial pain.<sup>11</sup> Subacromial pain is often considered to be caused by bony 'spurs'  
100 forming on the acromion, part of the shoulder blade, leading to inflammation in the surrounding

1  
2  
3 101 bursa and tendons.<sup>12 13</sup> Subacromial decompression removes the bony spur on the acromion and  
4  
5 102 releases the coracohumeral ligament.<sup>13 14</sup> There has been a rapidly increasing use of subacromial  
6  
7 103 decompression in England, with over 21,000 procedures carried out in 2009/10.<sup>13</sup>  
8  
9

10  
11 104 Two recent multi-centre randomised controlled trials (RCTs) have questioned the effectiveness of  
12  
13 105 subacromial decompression for shoulder pain.<sup>15 16</sup> The CSAW trial,<sup>12 15</sup> recruiting in England from  
14  
15 106 2012 to 2015, compared arthroscopic subacromial decompression surgery, placebo (investigational  
16  
17 107 shoulder arthroscopy), and no treatment.<sup>15</sup> It found no difference in shoulder function after six  
18  
19 108 months between the arthroscopic subacromial decompression group and the arthroscopy only  
20  
21 109 (placebo) group, with a small, non-clinically significant benefit of surgery over the no treatment  
22  
23 110 control. The FIMPACT trial,<sup>16</sup> recruiting in Finland from 2005 to 2013, compared subacromial  
24  
25 111 decompression with placebo surgery and exercise therapy and echoed the results of CSAW,  
26  
27 112 extending them to two years follow-up. The CSAW and FIMPACT trials seriously question whether  
28  
29 113 the resources invested in subacromial decompression represent good value for money for the NHS.  
30  
31 114 As a result, a recent BMJ article made a strong recommendation against subacromial decompression  
32  
33 115 surgery for chronic shoulder pain.<sup>17</sup>  
34  
35  
36  
37  
38

39 116 In this study we use subacromial decompression for shoulder pain as an example to explore the  
40  
41 117 relationship between evolving evidence and clinical practice for hospital procedures, including how  
42  
43 118 many procedures were performed over the last 10 years and how much money was spent before  
44  
45 119 RCT evidence raised questions about the procedure's value; how procedure rates compare to other  
46  
47 120 countries; and how the NHS might reduce the numbers of these procedures.  
48  
49

50 121

51  
52  
53 122

54  
55  
56 123

57  
58  
59 124  
60



## 125 **METHODS**

### 126 **Data sources**

127 Subacromial decompression procedures were identified using the 'admitted patient care' hospital  
128 episode statistics (HES-APC). HES is a routinely collected dataset that records all episodes of care  
129 provided to patients admitted (day case or inpatient) to NHS hospitals in England and NHS-funded  
130 patients treated in the independent sector.<sup>18,19</sup> Each episode in HES represents a period of care  
131 under one consultant team. Up to 20 diagnoses are recorded per episode using the International  
132 Classification of Diseases (ICD) version 10. Up to 24 clinical procedures per episode may be recorded  
133 using Office of Population, Censuses and Surveys (OPCS) (fourth revision) codes. HES also includes  
134 the Lower Super Output Area (LSOA) of residence for each patient.<sup>20</sup>

### 135 **Identifying subacromial decompression**

136 We extracted anonymised, individual episodes in the HES-APC (2007/8 to 2016/17) dataset. We used  
137 diagnosis and procedure codes<sup>13</sup> (Figure 1) to identify subacromial decompression. A small number  
138 of patients received multiple shoulder procedure episodes on the same day (0.3% of all episodes).  
139 When these were for the same procedure with the same laterality (0.25% of all episodes), we  
140 assumed coding error duplication so excluded the episodes. If a procedure was marked as bilateral  
141 (0.6%), this was counted as two procedures. We excluded patients who were not resident in  
142 England.

### 143 **Estimating procedure rates**

144 National trends over time were estimated using directly standardised procedure rates<sup>21</sup> (per  
145 100,000 population), with the population of England in 2016 as our standard population. For  
146 comparison of smaller areas, we estimated indirectly standardised rates<sup>22</sup> per 100,000 population,

1  
2  
3 147 using the same standard population, and adjusting for deprivation and ethnicity (see Appendix A for  
4  
5 148 more details).

### 9 149 **Estimating procedure costs**

10  
11  
12 150 Costs were estimated for each financial year by linking Healthcare Resource Group (HRG) codes for  
13  
14 151 each admission in HES with the Department of Health Payment by Results National Tariffs for the  
15  
16 152 appropriate financial year;<sup>23-32</sup> see Appendix A for more details.

### 19 153 **International comparisons**

20  
21  
22  
23 154 A search of Medline and the Cumulative Index of Nursing and Allied Health (CINAHL) databases was  
24  
25 155 conducted for the terms “acromioplasty” or “subacromial decompression” in conjunction with  
26  
27 156 “incidence” or “prevalence” or “epidemiology”. One author (TJ) screened the results for articles  
28  
29 157 including rates of subacromial decompression contemporary with our data, and further screened  
30  
31 158 cited articles within included studies, as well as articles which cited included studies.

32  
33  
34  
35 159 All statistical analyses were conducted using Stata/MP 14.2 for Windows and we mapped variation  
36  
37 160 in procedure rates across England in 2016/17 using ArcGIS ArcMap 10.5.1 for Desktop.

### 39 161 **Patient and public involvement**

40  
41  
42  
43 162 Patients involved in the CSAW trial reviewed this manuscript; they were interested by the results  
44  
45 163 and the cost-focussed perspective.

46  
47  
48  
49 164

50  
51  
52 165

53  
54  
55 166

56  
57  
58  
59 167

1  
2  
3 **168 RESULTS**  
4  
5

6 **169 The use of subacromial decompression in England**  
7  
8

9  
10 170 There were 15,112 subacromial decompression procedures (30 per 100,000 population) in 2007/8,  
11  
12 171 rising to 28,802 procedures (52 per 100,000 population) in 2016/17 (Figure 2), excluding those done  
13  
14 172 in combination with rotator cuff repair. This represents a 91% increase in the number of subacromial  
15  
16 173 decompressions over 10 years, with 266,692 procedures carried out in total. Most of this increase  
17  
18 174 took place before 2011/12, and procedure rates have slightly decreased between 2011/12 and  
19  
20 175 2016/17. The use of subacromial decompression in combination with rotator cuff repair has  
21  
22 176 continued to increase since the early 2000s, more notably from 2006/7 onwards. Whilst the gender  
23  
24 177 balance and age of those having shoulder surgery have remained steady over the last decade, the  
25  
26 178 proportion of procedures conducted as day cases, using arthroscopy, and/or by independent (i.e.  
27  
28 179 non-NHS) providers, have all increased (Table 1).  
29  
30  
31  
32  
33

34 181 Table 1: Descriptive information for subacromial decompression patients, 2007/08 and 2016/17  
35

|                         | 2007/08       | 2016/17       |
|-------------------------|---------------|---------------|
| Procedure Count         | 15,112        | 28,802        |
| %women                  | 51.0          | 52.0          |
| Age in years (SD)       | 54.94 (12.55) | 54.89 (12.39) |
| % Arthroscopy           | 39.0          | 94.1          |
| % Independent Providers | 2.4           | 31.9          |
| % Day-case              | 51.0          | 79.3          |

36  
37  
38  
39  
40  
41  
42  
43  
44 182

45 183  
46  
47

48 **184 The cost of subacromial decompression in England**  
49  
50

51 185 In 2016/17, the median cost of an elective admission for subacromial decompression alone was  
52  
53 186 £4,476. The cost of subacromial decompression in England rose from £33 million in 2007/08 to £125  
54  
55 187 million in 2016/17. Over the 10-year period between 2007/8 and 2016/17 just under £1.1 billion was  
56  
57 188 spent on subacromial decompression (excluding procedures done in combination with rotator cuff  
58  
59 189 repair).  
60

## 190 Variation in use of subacromial decompression in England

191 In 2016/17 there was substantial variation in procedure rates between CCGs, after adjusting for age,  
 192 sex, deprivation, and ethnicity profiles (Figure 3). The map demonstrates pockets of very high use  
 193 (>150% of the expected rate), for example in the Reading area, Wiltshire, and East Lincolnshire.  
 194 There were also areas where procedure rates were less than 50% of the expected rate, such as in  
 195 Worcestershire, Gloucestershire, Swindon, and North Norfolk. In 2016/17 the ratio of procedure  
 196 rates between a 'high use' CCG at the 90<sup>th</sup> percentile and a 'low use' CCG at the 10<sup>th</sup> percentile was  
 197 2.7 (95% CI: 2.2-3.4). This ratio has decreased since 2007/8, when the ratio was 3.6 (95% CI: 2.2-  
 198 6.1); see Table 2.

199 Table 2: 90/10 percentile ratios for directly age-sex standardised rates of subacromial  
 200 decompression by CCG, England, 2007/8-2016/17

| Year    | 90th Pct | 10th Pct | 90/10 Ratio (95% CI*) |
|---------|----------|----------|-----------------------|
| 2007/08 | 53       | 15       | 3.6 (2.2-6.1)         |
| 2008/09 | 55       | 16       | 3.3 (2.1-5.2)         |
| 2009/10 | 72       | 27       | 2.6 (2.0-3.5)         |
| 2010/11 | 87       | 33       | 2.6 (1.9-3.6)         |
| 2011/12 | 89       | 36       | 2.5 (2.0-3.1)         |
| 2012/13 | 90       | 33       | 2.7 (2.0-3.7)         |
| 2013/14 | 88       | 34       | 2.6 (2.1-3.3)         |
| 2014/15 | 89       | 33       | 2.7 (2.0-3.7)         |
| 2015/16 | 81       | 33       | 2.5 (1.4-4.3)         |
| 2016/17 | 83       | 30       | 2.7 (2.2-3.4)         |

201 \*Confidence intervals for rate ratios<sup>33</sup>

## 203 International comparison of rates of subacromial decompression

204 Table 3 shows rates of subacromial decompression in the most recent year available from England,  
 205 Finland, Florida State, New York State, and Western Australia. Rates in England were lower, often  
 206 only half, that of other countries. For subacromial decompression alone, the procedure rates were  
 207 lower in England (52 per 100,000 in 2016/17) than Western Australia (roughly 115 per 100,000 in  
 208 2013),<sup>34</sup> Florida State (130 per 100,000 in 2007),<sup>35</sup> and Finland (131 per 100,000 in 2011).<sup>36</sup>

209 For subacromial decompression combined with rotator cuff repair, rates were lower in England (80  
 210 per 100,000 in 2016/17) than in New York State a decade earlier (102 per 100,000 in 2006).<sup>37</sup>

211 Figure 2 compares trends in rates of subacromial decompression in England, Finland, Florida State,  
 212 New York State, and Western Australia. The rate of increase for subacromial decompression  
 213 observed in our study (x2 between 2007/8 and 2016/17) was similar to Western Australia (x2  
 214 between 2001 and 2013),<sup>34</sup> Finland (x2.2 between 1998 and 2007),<sup>36</sup> and New York State (x2.5  
 215 between 1996 and 2006),<sup>37</sup> but lower than Florida State (x4.4 between 2003 and 2007).<sup>35</sup> The use of  
 216 subacromial decompression in Finland peaked in 2007 and has since been declining, at least in  
 217 publicly-funded hospitals, which has been attributed to accumulating evidence that it is no more  
 218 clinically effective than non-surgical alternatives.<sup>36</sup>

219 Table 3: International comparisons of age-sex-standardised rates of subacromial decompression

| Article                | Country           | Data Year | SAD Rate (per 100,000 population) |
|------------------------|-------------------|-----------|-----------------------------------|
| Thorpe et al. (2016)   | Western Australia | 2013      | ~115                              |
| Paloneva et al. (2015) | Finland           | 2011      | 131                               |
| Vitale et al. (2010)   | New York State    | 2006      | 102                               |
| Iyengar et al. (2014)  | Florida State     | 2007      | ~130                              |
| Our Data (inc. RCR)    | England           | 2016/17   | 80                                |
| Our Data (exc. RCR)    | England           | 2016/17   | 52                                |

220 *Notes: Numbers for Thorpe et al (2016) and Iyengar et al. (2014) were estimated from a graph; New*  
 221 *York State data is for subacromial decompression with/without rotator cuff repair; SAD =*  
 222 *Subacromial Decompression; RCR = Rotator Cuff Repair<sup>34-37</sup>*

1  
2  
3 229 **DISCUSSION**  
4  
5

6 230 **Statement of principal findings**  
7  
8

9 231 NHS England carries out nearly 30,000 subacromial decompression operations per year, at an annual  
10  
11 232 cost of over £125 million. Between 2007/08 and 2016/17, 266,692 subacromial decompression  
12  
13 233 procedures were carried out in England costing nearly £1.1 billion, before the publication of CSAW  
14  
15 234 and FIMPACT trial results prompted questions about the clinical benefit of the procedure. Rates of  
16  
17 235 subacromial decompression alone in England have gradually declined since 2011/12, although an  
18  
19 236 increasing number are carried out in combination with rotator cuff repair. There was large variation  
20  
21 237 between CCGs in England, even after adjustment for demographic variables, with 'high-use' areas  
22  
23 238 carrying out nearly three times as many procedures as 'low-use' areas. Procedure rates in England  
24  
25 239 were notably lower than other countries, arguing against any levelling of procedure rates being due  
26  
27 240 to saturation of 'demand' for shoulder surgery.  
28  
29  
30  
31

32  
33 241 **Strengths and weaknesses of the study**  
34

35 242 Our study used a national, longitudinal dataset over a 10-year period covering all NHS secondary  
36  
37 243 care providers in England. Hospital Episode Statistics are administrative rather than specifically  
38  
39 244 designed for research. However, HES is also linked to payments for hospitals, which is a strong  
40  
41 245 incentive to provide complete data, and allowed us to produce what we believe is the first  
42  
43 246 exploration of costs associated with subacromial decompression in England. Payment by results  
44  
45 247 tariffs are based on average national costs and may not reflect precise costs for each hospital  
46  
47 248 admission. Population denominators, and linkage to the indices of multiple deprivation and census  
48  
49 249 ethnicity data, allowed us to investigate trends and variations in procedure rates standardised on  
50  
51 250 age, sex, deprivation and ethnicity. HES data records patients' area of residence, so we compared  
52  
53 251 procedure rates based on place of residence rather than place of treatment. There may be other  
54  
55 252 factors influencing rates which we have not controlled for (e.g. private health insurance coverage).  
56  
57  
58  
59  
60

1  
2  
3 253 HES does not record procedures which are privately funded and provided, meaning our surgery rates  
4  
5 254 are an under-estimate of the population rate. We only provide cost data from 2007/08 onwards, so  
6  
7 255 we under-estimate the amount spent on subacromial decompression prior to publication of the  
8  
9 256 CSAW and FIMPACT trial results. International estimations of procedure rates do not use identical  
10  
11 257 definitions of procedures and inclusion/exclusion criteria, but should be broadly comparable.  
12  
13  
14

### 15 258 **Implications for policymakers and clinicians**

16  
17  
18 259 NHS England spent over £1 billion on subacromial decompression during the last 10 years without  
19  
20 260 having compelling evidence of clinical effectiveness or cost-effectiveness. Rates of subacromial  
21  
22 261 decompression were already rising rapidly from 2000/01 onwards.<sup>13</sup> It seems plausible that  
23  
24 262 increasing awareness of concerns about the effectiveness of subacromial decompression surgery  
25  
26 263 and well-known recruitment to the CSAW trial tempered the rise in use of this surgery in England,  
27  
28 264 otherwise more may have been spent. The CSAW trial involved 51 surgeons in 30 centres  
29  
30 265 throughout the UK and was widely advertised and discussed amongst shoulder surgeons and  
31  
32 266 shoulder physiotherapists. Extensive consultation was carried out by the trial team prior to and  
33  
34 267 during the trial, including presentations at national meetings surveys and visits to individual  
35  
36 268 surgeons and centres.<sup>38</sup> A similar plateau/decrease in procedures was observed in Finland after the  
37  
38 269 commencement of the FIMPACT study in 2005 which involved only 3 centres in Finland (Figure 2).  
39  
40 270 However, it took well over a decade of increasing subacromial decompression use for clinical trial  
41  
42 271 groups to randomise a few hundred patients (313 patients for CSAW<sup>15</sup> and 210 in FIMPACT<sup>16</sup>) to  
43  
44 272 investigate its effectiveness. This delay may be due to perceived difficulties in recruiting patients to  
45  
46 273 surgical trials with non-surgical comparators (e.g. UKUFF<sup>39</sup>), as well as known challenges of  
47  
48 274 conducting surgical RCTs.<sup>40</sup> Methods to optimise recruitment, as used in CSAW and other trials,<sup>41</sup> are  
49  
50 275 available to support the completion of such 'difficult' trials;<sup>42</sup> this should not now be a barrier to  
51  
52 276 rapidly initiating trials to provide robust evidence about surgical interventions before they become  
53  
54 277 widespread. More time is needed to see the longer-term impact of publication of the CSAW and  
55  
56  
57  
58  
59  
60

1  
2  
3 278 FIMPACT results on subacromial decompression rates, both in the UK and internationally. It is also  
4  
5 279 worth noting the increasing tendency in England to carry out subacromial decompression in  
6  
7 280 combination with rotator cuff repair, and any impact on this following dissemination of the  
8  
9 281 CSAW/FIMPACT results.  
10  
11  
12

13 282 The National Institute for Health and Care Excellence (NICE) requires evidence of cost-effectiveness  
14  
15 283 to recommend new medicines to be paid for by the NHS. It is unclear why the bar for introducing  
16  
17 284 expensive surgical procedures should be significantly lower. A balance needs to be struck between  
18  
19 285 supporting innovation in surgical procedures and preventing unnecessary treatment. New initiatives  
20  
21 286 such as IDEAL (Idea, Development, Exploration, Assessment, Long-term Follow-up, Improving the  
22  
23 287 Quality of Research in Surgery)<sup>43</sup> aim to provide such a regulatory framework for introducing new  
24  
25 288 interventions.  
26  
27  
28

29  
30 289 It is important that new evidence is disseminated quickly without causing inequities in access to  
31  
32 290 care. NICE published an updated Clinical Knowledge Summary for shoulder pain in April 2017<sup>44</sup>  
33  
34 291 incorporating information from a commissioning guide published by the Royal College of Surgeons.<sup>45</sup>  
35  
36 292 This recommended a range of conservative treatments from physiotherapy to corticosteroid  
37  
38 293 injections, before surgery. However, many CCGs introduced their own criteria-based policies for  
39  
40 294 access to shoulder surgery (e.g. through Individual Funding Requests)<sup>46</sup> at different times and with  
41  
42 295 different details, underlining the extent to which insufficient evidence may drive clinical and  
43  
44 296 commissioner uncertainty,<sup>47</sup> and possibly leading to the wide variations shown across CCGs in our  
45  
46 297 data. Where scientific evidence is applicable nationally or internationally, it would seem more  
47  
48 298 efficient and appropriate to apply national policies to inform optimal use and encourage further  
49  
50 299 research. There is a need to improve techniques for empirically-informed policy development in  
51  
52 300 collaboration with relevant stakeholders.<sup>48 49</sup> It is also important to note that certain patients may  
53  
54 301 still benefit from surgery. Further well conducted research is needed to understand if specific sub-  
55  
56 302 groups of patients might benefit from subacromial decompression surgery.  
57  
58  
59  
60



1  
2  
3 303 Despite the criticisms provided above, England has lower rates of shoulder surgery than other  
4  
5 304 countries. The reasons for this are uncertain but could be due to differences in the health systems  
6  
7 305 (e.g. GP gatekeeping of services), access to surgery and hospital reimbursement. Additionally, the  
8  
9  
10 306 National Institute of Health Research in England has funded major clinical trials on shoulder  
11  
12 307 surgery,<sup>15 39</sup> as well as other procedures,<sup>50 51</sup> and is about to fund a further clinical trial to compare  
13  
14 308 surgery with placebo surgery for partial thickness rotator cuff tears.<sup>52</sup> Whilst the UK's national  
15  
16 309 regulatory processes are imperfect, they may provide examples to learn from. However, these  
17  
18 310 processes did not sufficiently constrain the use of subacromial decompression, a procedure later  
19  
20 311 found to have little clinical benefit.

21  
22  
23  
24 312 There have been several other controversies regarding the lack of effectiveness of procedures which  
25  
26 313 have become commonplace. One example is the use of stents to open narrowed arteries for  
27  
28 314 treatment of stable angina (chest pain). Around half a million people receive stents for stable angina  
29  
30 315 each year in the US and Europe,<sup>53</sup> but a recent (RCT) including a placebo intervention found no  
31  
32 316 difference in chest pain outcomes between inserting a stent and using standard medications.<sup>54</sup>  
33  
34 317 Another example is arthroscopy to clean out the knee joint, on which around \$4 billion is spent each  
35  
36 318 year in the US.<sup>55</sup> Recent RCTs,<sup>56 57</sup> including one using a placebo procedure as a comparison,<sup>57</sup> found  
37  
38 319 no evidence of effectiveness to justify the spending. Whilst we use subacromial decompression as an  
39  
40 320 example in this study, our observations are likely to apply to interventional procedures more  
41  
42 321 generally.

## 43 44 45 46 47 322 **Unanswered questions and future research**

48  
49  
50  
51 323 The example of subacromial decompression highlights that, in the absence of rigorous evaluation,  
52  
53 324 costly interventions can proliferate over a long period of time. To maximise limited resources, it is  
54  
55 325 vital that methods are developed to identify promising procedures early and commission trials to  
56  
57 326 examine their value, as well as identify existing health technologies that may be ineffective, leading  
58  
59 327 to over-treatment and wasting of resources.

1  
2  
3 328 There is an opportunity for a natural experiment exploring the impact of the results of the CSAW and  
4  
5 329 FIMPACT trials<sup>15 16</sup> on the development of CCG policies, national guidelines, and clinical decision-  
6  
7 330 making with surgeons and patients. It is arguable that we should now see swift reductions in the use  
8  
9 331 of subacromial decompression; research studies could help enhance the transfer of knowledge from  
10  
11 332 trials into clinical practice.  
12  
13  
14

15 333 **Conclusions**  
16

17  
18 334 NHS England pays for nearly 30,000 shoulder subacromial decompression procedures each year at  
19  
20 335 an annual cost of over £125 million, with little evidence that they are effective or cost-effective. The  
21  
22 336 rates of this operation in other countries are even higher. This raises serious questions around the  
23  
24 337 regulatory and professional processes governing the adoption and widespread use of surgical  
25  
26 338 interventions. High quality RCTs should be funded early to examine the effectiveness and cost-  
27  
28 339 effectiveness of expensive procedures using methods to optimise recruitment, and robust processes  
29  
30 340 should be developed to reduce the use of ineffective procedures.  
31  
32  
33  
34  
35 341  
36  
37  
38 342  
39  
40  
41 343  
42  
43  
44 344  
45  
46  
47 345  
48  
49  
50 346  
51  
52  
53 347  
54  
55  
56 348  
57  
58 349  
59  
60

1  
2  
3 350 **Author Statement**  
4  
5

6 351 This publication is the work of the authors, who serve as guarantors for the contents of this paper. TJ  
7  
8 352 contributed to study design, data cleaning, data analysis, interpretation of results and writing the  
9  
10 353 manuscript. MJL contributed to study design, data cleaning, interpretation of results and writing the  
11  
12 354 manuscript. AC contributed to study design, interpretation of results and writing the manuscript. DB,  
13  
14 355 LR, and JD contributed to interpretation of results and writing the manuscript. WH contributed to  
15  
16 356 study conceptualization, study design, interpretation of results and writing the manuscript. TJ had  
17  
18 357 full access to the data in the study and takes responsibility for the integrity of the data and the  
19  
20 358 accuracy of the data analysis. The authors would like to thank two patients from the CSAW trial,  
21  
22 359 Carol Brennan and Dair Farrer-Hockley, who took the time to read and comment on this manuscript.  
23  
24  
25

26  
27 360 **Funding**  
28  
29

30 361 This research was funded by the National Institute for Health Research (NIHR) Collaboration for  
31  
32 362 Leadership in Applied Health Research and Care West (NIHR CLAHRC West). The views expressed in  
33  
34 363 this article are those of the author(s) and not necessarily those of the NHS, the NIHR, or the  
35  
36 364 Department of Health and Social Care.  
37  
38

39 365 **Ethical Approval**  
40  
41

42 366 We were provided with routinely-collected Hospital Episode Statistics data under licence from NHS  
43  
44 367 Digital (DARS-NIC-17875-X7K1V). The licence allows us to use the information under Section 261 of  
45  
46 368 the Health and Social Care Act 2012, 2(b)(ii): "after taking into account the public interest as well as  
47  
48 369 the interests of the relevant person, considers that it is appropriate for the information to be  
49  
50 370 disseminated".  
51  
52  
53

54 371 **Data Sharing**  
55  
56

57 372 This study is based in part on data from the Hospital Episode Statistics (HES) obtained under licence  
58  
59 373 (DARS-NIC-17875-X7K1V) from NHS Digital (previously the Health and Social Care Information  
60

1  
2  
3 374 Centre); Copyright © 2018, re-used with the permission of The Health & Social Care Information

4  
5 375 Centre. All rights reserved. The data are provided by patients and collected by the NHS as part of

6  
7 376 their care and support. HES data can be accessed via NHS Digital:

8  
9  
10 377 <https://digital.nhs.uk/services/data-access-request-service-dars>

11  
12  
13 378 **Transparency**

14  
15 379 The manuscript's guarantor (TJ) affirms that the manuscript is an honest, accurate, and transparent

16  
17 380 account of the study being reported; that no important aspects of the study have been omitted; and

18  
19 381 that any discrepancies from the study as originally planned have been explained.

20  
21  
22  
23 382 **Competing Interests**

24  
25 383 All authors have completed the ICMJE uniform disclosure form at [www.icmje.org/coi\\_disclosure.pdf](http://www.icmje.org/coi_disclosure.pdf)

26  
27 384 and declare: TJ and JD had financial support from NIHR CLAHRC West for the submitted work; no

28  
29 385 financial relationships with any organisations that might have an interest in the submitted work in

30  
31 386 the previous three years; no other relationships or activities that could appear to have influenced

32  
33 387 the submitted work.

34  
35 388

36  
37 389

38  
39 390

40  
41 391

42  
43 392

44  
45 393

46  
47 394

48  
49 395

50  
51 396

52  
53 397

54  
55 398

56  
57 399

58  
59 400

60  
401

402

403

404

405

406

407

1  
2  
3 408 **REFERENCES**  
4 409

- 5 410 1. Care Quality Commission. The state of health care and adult social care in England, 2017. Available  
6 411 from: [http://www.cqc.org.uk/sites/default/files/20171017\\_stateofcare1617\\_report.pdf](http://www.cqc.org.uk/sites/default/files/20171017_stateofcare1617_report.pdf).  
7 412 2. NHS Clinical Commissioners. About CCGs 2017 [Available from: <https://www.nhscc.org/ccgs/>  
8 413 accessed 3rd November 2017].  
9 414 3. Office for National Statistics. UK Health Accounts: 2016, 2018. Available from:  
10 415 <https://www.ons.gov.uk/peoplepopulationandcommunity/healthandsocialcare/healthcaresystem/bulletins/ukhealthaccounts/2016>.  
11 416 4. Campbell B. Regulation and safe adoption of new medical devices and procedures. *Brit Med Bull*  
12 417 2013;107(1):5-18. doi: 10.1093/bmb/ldt022  
13 418 5. Darrow JJ. Explaining the absence of surgical procedure regulation. *Cornell Journal of Law and*  
14 419 *Public Policy* 2017;27(1):189-206.  
15 420 6. Hollingworth W, Jones T, Reeves BC, et al. A longitudinal study to assess the frequency and cost of  
16 421 antivasular endothelial therapy, and inequalities in access, in England between 2005 and  
17 422 2015. *Bmj Open* 2017;7(10) doi: 10.1136/bmjopen-2017-018289  
18 423 7. Tatsioni A, Bonitsis NG, Ioannidis JPA. Persistence of contradicted claims in the literature. *Jama-J*  
19 424 *Am Med Assoc* 2007;298(21):2517-26. doi: DOI 10.1001/jama.298.21.2517  
20 425 8. Jevne J. The sexy scalpel: unnecessary shoulder surgery on the rise. *Brit J Sport Med*  
21 426 2015;49(16):1031-32. doi: 10.1136/bjsports-2015-094589  
22 427 9. NHS England, NHS Clinical Commissioners, Academy of Medical Royal Colleges, et al. Evidence-  
23 428 Based Interventions: Consultation Document: NHS England, 2018.  
24 429 10. Luime JJ, Koes BW, Hendriksen IJM, et al. Prevalence and incidence of shoulder pain in the  
25 430 general population; a systematic review. *Scand J Rheumatol* 2004;33(2):73-81. doi:  
26 431 10.1080/03009740310004667  
27 432 11. Mitchell C, Adebajo A, Hay E, et al. Shoulder pain: diagnosis and management in primary care.  
28 433 *Brit Med J* 2005;331(7525):1124-28a. doi: DOI 10.1136/bmj.331.7525.1124  
29 434 12. Beard D, Rees J, Rombach I, et al. The CSAW Study (Can Shoulder Arthroscopy Work?) - a  
30 435 placebo-controlled surgical intervention trial assessing the clinical and cost effectiveness of  
31 436 arthroscopic subacromial decompression for shoulder pain: study protocol for a randomised  
32 437 controlled trial. *Trials* 2015;16 doi: 10.1186/s13063-015-0725-y  
33 438 13. Judge A, Murphy RJ, Maxwell R, et al. Temporal trends and geographical variation in the use of  
34 439 subacromial decompression and rotator cuff repair of the shoulder in England. *Bone Joint J*  
35 440 2014;96b(1):70-74. doi: 10.1302/0301-620x.96b1.32556  
36 441 14. Chalmers PN, Romeo AA. Arthroscopic Subacromial Decompression and Acromioplasty. *Jbjs*  
37 442 *Essent Surg Tec* 2016;6(2) doi: 10.2106/JBJS.ST.O.00011  
38 443 15. Beard DJ, Rees JL, Cook JA, et al. Arthroscopic subacromial decompression for subacromial  
39 444 shoulder pain (CSAW): a multicentre, pragmatic, parallel group, placebo-controlled, three-  
40 445 group, randomised surgical trial. *The Lancet* 2017 doi: 10.1016/s0140-6736(17)32457-1  
41 446 16. Paavola M, Malmivaara A, Taimela S, et al. Subacromial decompression versus diagnostic  
42 447 arthroscopy for shoulder impingement: randomised, placebo surgery controlled clinical trial.  
43 448 *Bmj-Brit Med J* 2018;362 doi: 10.1136/bmj.k2860  
44 449 17. Vandvik PO, Lähdeoja T, Ardern C, et al. Subacromial decompression surgery for adults with  
45 450 shoulder pain: a clinical practice guideline. *BMJ* 2019;364:l294. doi: 10.1136/bmj.l294  
46 451 18. Health and Social Care Information Centre. Hospital Episode Statistics (HES) Analysis Guide, 2015.  
47 452 19. Herbert A, Wijlaars L, Zylbersztejn A, et al. Data Resource Profile: Hospital Episode Statistics  
48 453 Admitted Patient Care (HES APC). *Int J Epidemiol* 2017;46(4):1093-+. doi: 10.1093/ije/dyx015  
49 454 20. NHS Digital. Lower Layer Super Output Area . Available from:  
50 455 [https://www.datadictionary.nhs.uk/data\\_dictionary/nhs\\_business\\_definitions/l/lower\\_layer](https://www.datadictionary.nhs.uk/data_dictionary/nhs_business_definitions/l/lower_layer_super_output_area_de.asp?shownav=1)  
51 456 [super\\_output\\_area\\_de.asp?shownav=1](https://www.datadictionary.nhs.uk/data_dictionary/nhs_business_definitions/l/lower_layer_super_output_area_de.asp?shownav=1) accessed 14 May 2018.  
52 457  
53  
54  
55  
56  
57  
58  
59  
60

- 1  
2  
3 458 21. Standardization: a classic epidemiological method for the comparison of rates. *Epidemiol Bull*  
4 459 2002;23(3):9-12. [published Online First: 2003/03/01]  
5 460 22. Anon. Standardization: a classic epidemiological method for the comparison of rates.  
6 461 *Epidemiological Bulletin* 2002;23(3):9-12.  
7 462 23. Department of Health. Payment by Results National Tariffs 2016/17, 2016. Available from:  
8 463 <https://www.gov.uk/government/publications/nhs-national-tariff-payment-system-201617>  
9 464 accessed 30 November 2017.  
10 465 24. Department of Health. Payment by Results Enhanced Tariff Option 2015/16, 2015. Available  
11 466 from:  
12 467 [http://webarchive.nationalarchives.gov.uk/20161103233943/https://www.england.nhs.uk/r](http://webarchive.nationalarchives.gov.uk/20161103233943/https://www.england.nhs.uk/resources/pay-syst/tariff-guide/)  
13 468 [esources/pay-syst/tariff-guide/](http://webarchive.nationalarchives.gov.uk/20161103233943/https://www.england.nhs.uk/resources/pay-syst/tariff-guide/) accessed 30 November 2017.  
14 469 25. Department of Health. Payment by Results National Tariffs 2014/15, 2014. Available from:  
15 470 [https://www.gov.uk/government/publications/national-tariff-payment-system-2014-to-](https://www.gov.uk/government/publications/national-tariff-payment-system-2014-to-2015)  
16 471 [2015](https://www.gov.uk/government/publications/national-tariff-payment-system-2014-to-2015) accessed 30 November 2017.  
17 472 26. Department of Health. Payment by Results National Tariffs 2013/14, 2013. Available from:  
18 473 [https://www.gov.uk/government/publications/payment-by-results-pbr-operational-](https://www.gov.uk/government/publications/payment-by-results-pbr-operational-guidance-and-tariffs)  
19 474 [guidance-and-tariffs](https://www.gov.uk/government/publications/payment-by-results-pbr-operational-guidance-and-tariffs) accessed 30 November 2017.  
20 475 27. Department of Health. Payment by Results National Tariffs 2012/13, 2012. Available from:  
21 476 [https://www.gov.uk/government/publications/confirmation-of-payment-by-results-pbr-](https://www.gov.uk/government/publications/confirmation-of-payment-by-results-pbr-arrangements-for-2012-13)  
22 477 [arrangements-for-2012-13](https://www.gov.uk/government/publications/confirmation-of-payment-by-results-pbr-arrangements-for-2012-13) accessed 30 November 2017.  
23 478 28. Department of Health. Payment by Results National Tariffs 2011/12, 2011. Available from:  
24 479 [http://webarchive.nationalarchives.gov.uk/20130507170152/https://www.gov.uk/governm](http://webarchive.nationalarchives.gov.uk/20130507170152/https://www.gov.uk/government/publications/confirmation-of-payment-by-results-pbr-arrangements-for-2011-12)  
25 480 [ent/publications/confirmation-of-payment-by-results-pbr-arrangements-](http://webarchive.nationalarchives.gov.uk/20130507170152/https://www.gov.uk/government/publications/confirmation-of-payment-by-results-pbr-arrangements-for-2011-12) for-2011-12  
26 481 accessed 30 November 2017.  
27 482 29. Department of Health. Payment by Results National Tariffs 2010/11, 2010. Available from:  
28 483 <https://data.gov.uk/dataset/payment-by-results-2010-11-national-tariff-information>  
29 484 accessed 30 November 2017.  
30 485 30. Department of Health. Payment by Results National Tariffs 2009/10, 2009. Available from:  
31 486 [http://webarchive.nationalarchives.gov.uk/+http://www.dh.gov.uk/en/Publicationsandstat](http://webarchive.nationalarchives.gov.uk/+http://www.dh.gov.uk/en/Publicationsandstatistics/Publications/PublicationsPolicyAndGuidance/DH_094091)  
32 487 [istics/Publications/PublicationsPolicyAndGuidance/DH\\_094091](http://webarchive.nationalarchives.gov.uk/+http://www.dh.gov.uk/en/Publicationsandstatistics/Publications/PublicationsPolicyAndGuidance/DH_094091) accessed 30 November  
33 488 2017.  
34 489 31. Department of Health. Payment by Results National Tariffs 2008/09, 2008. Available from:  
35 490 [http://webarchive.nationalarchives.gov.uk/+http://www.dh.gov.uk/en/Managingyourorga](http://webarchive.nationalarchives.gov.uk/+http://www.dh.gov.uk/en/Managingyourorganisation/Financeandplanning/NHSFinancialReforms/DH_081238)  
36 491 [nisation/Financeandplanning/NHSFinancialReforms/DH\\_081238](http://webarchive.nationalarchives.gov.uk/+http://www.dh.gov.uk/en/Managingyourorganisation/Financeandplanning/NHSFinancialReforms/DH_081238) accessed 30 November  
37 492 2017.  
38 493 32. Department of Health. Payment by Results National Tariffs 2007/08, 2007. Available from:  
39 494 [http://webarchive.nationalarchives.gov.uk/+http://www.dh.gov.uk/en/Publicationsandstat](http://webarchive.nationalarchives.gov.uk/+http://www.dh.gov.uk/en/Publicationsandstatistics/Publications/PublicationsPolicyAndGuidance/DH_062914)  
40 495 [istics/Publications/PublicationsPolicyAndGuidance/DH\\_062914](http://webarchive.nationalarchives.gov.uk/+http://www.dh.gov.uk/en/Publicationsandstatistics/Publications/PublicationsPolicyAndGuidance/DH_062914) accessed 30 November  
41 496 2017.  
42 497 33. Kirkwood BR, Sterne JA. Rate Ratios. Essential Medical Statistics. Oxford, UK: Blackwell Science  
43 498 Ltd 2003:241-42.  
44 499 34. Thorpe A, Hurworth M, O'Sullivan P, et al. Rising trends in surgery for rotator cuff disease in  
50 500 Western Australia. *Anz J Surg* 2016;86(10):801-04. doi: 10.1111/ans.13691  
51 501 35. Iyengar JJ, Samagh SP, Schairer W, et al. Current Trends in Rotator Cuff Repair: Surgical  
52 502 Technique, Setting, and Cost. *Arthroscopy* 2014;30(3):284-88. doi:  
53 503 10.1016/j.arthro.2013.11.018  
54 504 36. Paloneva J, Lepola V, Karppinen J, et al. Declining incidence of acromioplasty in Finland. *Acta*  
55 505 *Orthop* 2015;86(2):220-24. doi: 10.3109/17453674.2014.977703  
56 506 37. Vitale MA, Arons RR, Hurwitz S, et al. The Rising Incidence of Acromioplasty. *J Bone Joint Surg Am*  
57 507 2010;92a(9):1842-50. doi: 10.2106/Jbjs.I.01003  
58  
59  
60

1  
2  
3  
4  
5  
6  
7  
8  
9  
10  
11  
12  
13  
14  
15  
16  
17  
18  
19  
20  
21  
22  
23  
24  
25  
26  
27  
28  
29  
30  
31  
32  
33  
34  
35  
36  
37  
38  
39  
40  
41  
42  
43  
44  
45  
46  
47  
48  
49  
50  
51  
52  
53  
54  
55  
56  
57  
58  
59  
60

- 508 38. Wartolowska K, Beard DJ, Carr AJ. Attitudes and Beliefs about Placebo Surgery among  
509 Orthopedic Shoulder Surgeons in the United Kingdom. *Plos One* 2014;9(3) doi:  
510 10.1371/journal.pone.0091699
- 511 39. Carr A, Cooper C, Campbell MK, et al. Effectiveness of open and arthroscopic rotator cuff repair  
512 (UKUFF) A RANDOMISED CONTROLLED TRIAL. *Bone Joint J* 2017;99b(1):107-15. doi:  
513 10.1302/0301-620x.99b1.Bjj-2016-0424.R1
- 514 40. Cook JA, Ramsay CR, Norrie J. Recruitment to publicly funded trials - Are surgical trials really  
515 different? *Contemp Clin Trials* 2008;29(5):631-34. doi: 10.1016/j.cct.2008.02.005
- 516 41. Rooshenas L, Scott LJ, Blazeby JM, et al. The Quintet Recruitment Intervention supported five  
517 randomized trials to recruit to target: a mixed-methods evaluation, 2018. Available from:  
518 <https://doi.org/10.1016/j.jclinepi.2018.10.004>.
- 519 42. Donovan JL, Rooshenas L, Jepson M, et al. Optimising recruitment and informed consent in  
520 randomised controlled trials: the development and implementation of the Quintet  
521 Recruitment Intervention (QRI). *Trials* 2016;17 doi: 10.1186/s13063-016-1391-4
- 522 43. Hirst A, Philippou Y, Blazeby J, et al. No Surgical Innovation Without Evaluation: Evolution and  
523 Further Development of the IDEAL Framework and Recommendations. *Annals of Surgery*  
524 2018 doi: 10.1097/SLA.0000000000002794
- 525 44. National Institute for Health and Care Excellence. Shoulder Pain, 2017.
- 526 45. The Royal College of Surgeons of England. Commissioning guide: Subacromial shoulder pain,  
527 2014.
- 528 46. Iacobucci G. Pressure on NHS finances drives new wave of postcode rationing. *Bmj-Brit Med J*  
529 2017;358 doi: 10.1136/bmj.j3190
- 530 47. Wennberg JE, Barnes BA, Zubkoff M. Professional Uncertainty and the Problem of Supplier-  
531 Induced Demand. *Soc Sci Med* 1982;16(7):811-24. doi: Doi 10.1016/0277-9536(82)90234-9
- 532 48. Hollingworth W, Rooshenas L, Busby J, et al. Using clinical practice variations as a method for  
533 commissioners and clinicians to identify and prioritise opportunities for disinvestment in  
534 health care: a cross-sectional study, systematic reviews and qualitative study. *Health*  
535 *Services and Delivery Research* 2015 doi: 10.3310/hsdr03130
- 536 49. Rooshenas L, Owen-Smith A, Hollingworth W, et al. "I won't call it rationing ...": An ethnographic  
537 study of healthcare disinvestment in theory and practice. *Soc Sci Med* 2015;128:273-81. doi:  
538 10.1016/j.socscimed.2015.01.020
- 539 50. Hamdy FC, Donovan JL, Lane JA, et al. 10-Year Outcomes after Monitoring, Surgery, or  
540 Radiotherapy for Localized Prostate Cancer. *New Engl J Med* 2016;375(15):1415-24. doi:  
541 10.1056/NEJMoa1606220
- 542 51. Rubie I, Houghton C, O'Hara J, et al. The National randomised controlled Trial of Tonsillectomy IN  
543 Adults (NATTINA): a clinical and cost-effectiveness study: study protocol for a randomised  
544 control trial. *Trials* 2015;16 doi: 10.1186/s13063-015-0768-0
- 545 52. National Institute for Health Research. 18/109 Management of Partial Thickness Rotator-Cuff  
546 Tears, 2018. Available from: [https://www.nihr.ac.uk/funding-and-support/funding-](https://www.nihr.ac.uk/funding-and-support/funding-opportunities/18109-management-of-partial-thickness-rotator-cuff-tears/89052018)  
547 [opportunities/18109-management-of-partial-thickness-rotator-cuff-tears/89052018](https://www.nihr.ac.uk/funding-and-support/funding-opportunities/18109-management-of-partial-thickness-rotator-cuff-tears/89052018).
- 548 53. Belluz J. Thousands of heart patients get stents that may do more harm than good: Vox; 2017.  
549 Available from: [https://www.vox.com/science-and-health/2017/11/3/16599072/stent-](https://www.vox.com/science-and-health/2017/11/3/16599072/stent-chest-pain-treatment-angina-not-effective)  
550 [chest-pain-treatment-angina-not-effective](https://www.vox.com/science-and-health/2017/11/3/16599072/stent-chest-pain-treatment-angina-not-effective).
- 551 54. Al-Lamee R, Thompson D, Dehbi HM, et al. Percutaneous coronary intervention in stable angina  
552 (ORBITA): a double-blind, randomised controlled trial. *Lancet* 2018;391(10115):31-40. doi:  
553 10.1016/S0140-6736(17)32714-9
- 554 55. Epstein D. When evidence says no, but doctors say yes: ProPublica; 2017. Available from:  
555 [https://web.archive.org/web/20170316151510/https://www.propublica.org/article/when-](https://web.archive.org/web/20170316151510/https://www.propublica.org/article/when-evidence-says-no-but-doctors-say-yes2018)  
556 [evidence-says-no-but-doctors-say-yes2018](https://web.archive.org/web/20170316151510/https://www.propublica.org/article/when-evidence-says-no-but-doctors-say-yes2018).
- 557 56. Katz JN, Brophy RH, Chaisson CE, et al. Surgery versus Physical Therapy for a Meniscal Tear and  
558 Osteoarthritis. *New Engl J Med* 2013;368(18):1675-84. doi: 10.1056/NEJMoa1301408

- 1  
2  
3 559 57. Sihvonen R, Paavola M, Malmivaara A, et al. Arthroscopic Partial Meniscectomy versus Sham  
4 560 Surgery for a Degenerative Meniscal Tear. *New Engl J Med* 2013;369(26):2515-24. doi:  
5 561 10.1056/NEJMoa1305189  
6  
7  
8  
9  
10  
11  
12  
13  
14  
15  
16  
17  
18  
19  
20  
21  
22  
23  
24  
25  
26  
27  
28  
29  
30  
31  
32  
33  
34  
35  
36  
37  
38  
39  
40  
41  
42  
43  
44  
45  
46  
47  
48  
49  
50  
51  
52  
53  
54  
55  
56  
57  
58  
59  
60

For peer review only



**FIGURE CAPTIONS**

Figure 1. ICD-10 and OPCS-4 codes used to define subacromial decompression<sup>13</sup>

Figure 2. Directly standardised rates (per 100,000 people) of subacromial decompression in England, Finland, New York State USA, Florida State USA, and Western Australia

Notes for Figure 2. England data prior to 2007 is taken from Judge et al.<sup>13</sup>; New York State data is for subacromial decompression with or without rotator cuff repair, whilst data for Florida State, Finland and Western Australia is for subacromial decompression alone<sup>34-37</sup>; RCR = Rotator Cuff Repair

Figure 3. Indirectly standardised rates of subacromial decompression by CCG in England, 2016/17

For peer review only

| <i>Any of these <b>diagnosis</b> codes in any position</i> |                        | <i>Any of these <b>procedure</b> codes in any position</i>                       |
|------------------------------------------------------------|------------------------|----------------------------------------------------------------------------------|
| M75.1 Rotator cuff syndrome                                | In combination with... | W84.8 Other specified therapeutic endoscopic operations on other joint structure |
| M75.3 Calcific tendinitis of shoulder                      |                        | Y52.8 Other specified approach to organ through other opening                    |
| M75.4 Impingement syndrome of shoulder                     |                        | Y76.7 Arthroscopic approach to joint                                             |
| M75.5 Bursitis of shoulder                                 |                        | W84.4 Endoscopic decompression of joint                                          |

OR

| <i>This <b>procedure</b> code in any position</i> |
|---------------------------------------------------|
| O29.1 Subacromial decompression                   |

Figure 1. ICD-10 and OPCS-4 codes used to define subacromial decompression<sup>13</sup>

102x65mm (300 x 300 DPI)

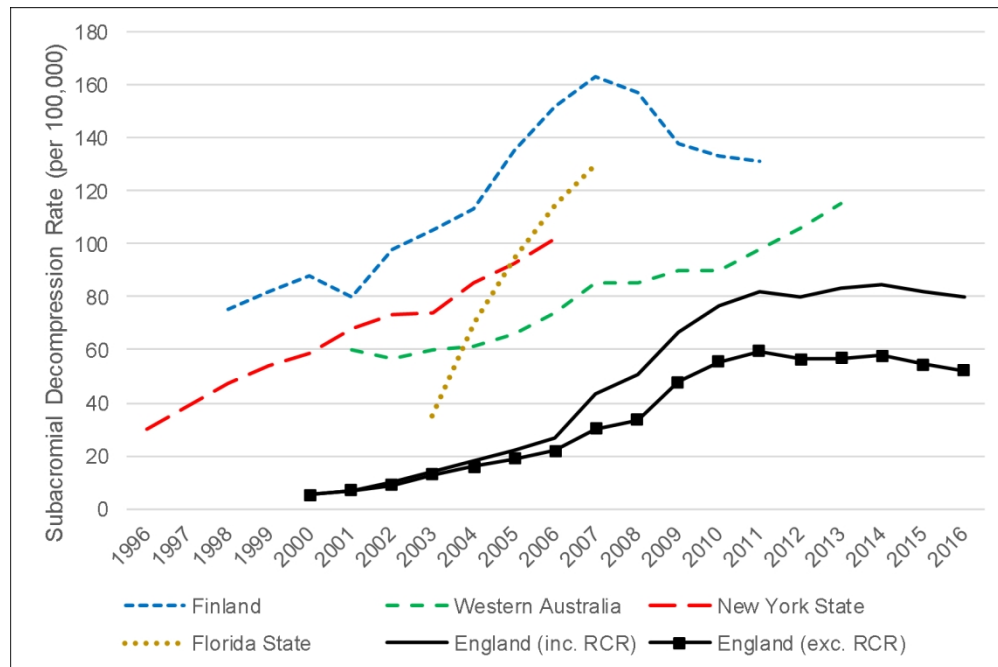

Figure 2. Directly standardised rates (per 100,000 people) of subacromial decompression in England, Finland, New York State USA, Florida State USA, and Western Australia

Notes for Figure 2. England data prior to 2007 is taken from Judge et al.<sup>13</sup>; New York State data is for subacromial decompression with or without rotator cuff repair, whilst data for Florida State, Finland and Western Australia is for subacromial decompression alone<sup>34-37</sup>; RCR = Rotator Cuff Repair

150x99mm (300 x 300 DPI)

1  
2  
3  
4  
5  
6  
7  
8  
9  
10  
11  
12  
13  
14  
15  
16  
17  
18  
19  
20  
21  
22  
23  
24  
25  
26  
27  
28  
29  
30  
31  
32  
33  
34  
35  
36  
37  
38  
39  
40  
41  
42  
43  
44  
45  
46  
47  
48  
49  
50  
51  
52  
53  
54  
55  
56  
57  
58  
59  
60

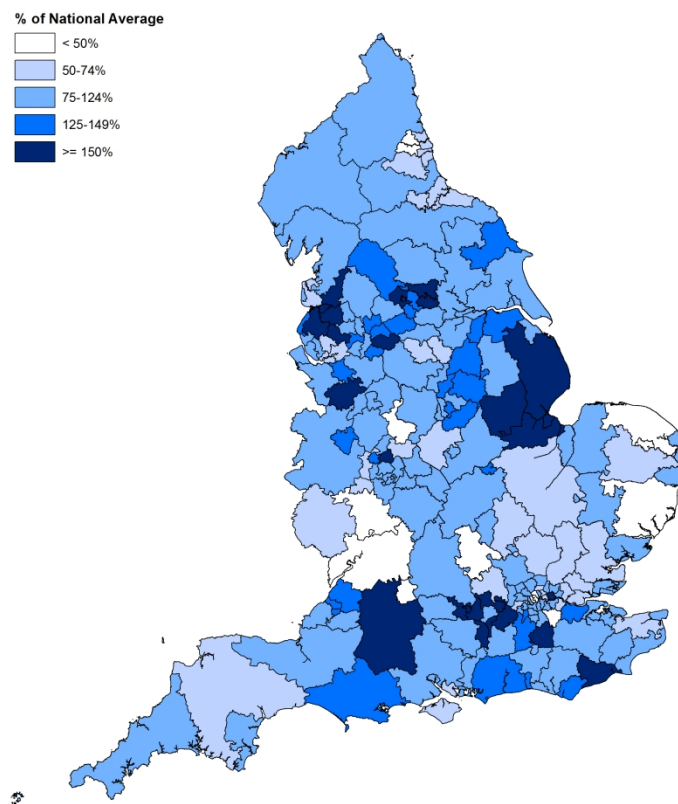

Figure 3. Indirectly standardised rates of subacromial decompression by CCG in England, 2016/17

210x296mm (300 x 300 DPI)

## APPENDIX A: METHODOLOGICAL DETAILS

### Estimating Procedure Rates

National trends over time were estimated using directly standardised procedure rates<sup>(1)</sup> (per 100,000 population), with the population of England in 2016 as our standard population. We first summed the number of shoulder procedures, grouped by sex, quintiles of age, and financial year. These procedure counts were used to calculate annual age-sex-specific rates, by dividing by the appropriate age-sex-specific mid-year populations of England<sup>(2)</sup> (e.g. for the 2012/13 financial year, the mid-2012 populations were used). We weighted the annual age-sex-specific rates according to the population distribution of England in 2016, to produce directly standardised rates for each year. The standardised rates for 2016/17 are the same as the crude rates.

For comparison of smaller areas, we estimated indirectly standardised rates<sup>(3)</sup> per 100,000 population. We first calculated age-sex-specific rates for England in 2016/17, then multiplied these rates by the age-sex-specific population for the area of interest<sup>(2, 4, 5)</sup> (e.g. CCG) and summed the results. This produced the expected number of patients and procedures for that area, if it were to have the same age-sex-specific rates as England. The expected number was then compared to the observed number of patients and procedures for that area. A Poisson regression model was fitted to the observed counts for each year, with the expected counts as an offset and socio-economic deprivation (using the overall score from the English Indices of Multiple Deprivation<sup>(6)</sup>) and ethnicity (% white British<sup>(7)</sup>) as predictive factors. The model was then used to predict new expected counts for each area based on deprivation and ethnicity, and form indirectly standardised procedure ratios (observed / expected).

## Estimating Procedure Costs

Costs were estimated for each financial year by linking HRG codes for each admission in HES with the Department of Health Payment by Results National Tariffs for the appropriate financial year.<sup>(8-17)</sup> Enhanced Tariff Option (ETO) tariffs were applied for 2015/16 as, following a dispute, 88% of providers agreed to use ETO tariffs for that financial year.<sup>(18)</sup> The National Tariffs provide costs for day cases and longer stays, for both elective and non-elective admissions. They also provide additional daily costs for admissions that go above a threshold number of days (termed excess bed days), which varies for different types of admission. To calculate the cost of admission, we excluded admissions without a discharge date (used to calculate number of bed days) or without a HRG code that matched to the National Tariffs (0.7% excluded). We then applied the relevant national tariff or alternatively the best practice tariff where applicable (only for HRG code HB62C under specified circumstances) and added excess bed day costs (if there were any). Following this, the special service top-up for orthopaedic procedures was applied for each year.

## References

1. Standardization: a classic epidemiological method for the comparison of rates. *Epidemiol Bull.* 2002;23(3):9-12.
2. Office for National Statistics. Lower Super Output Area Mid-Year Population Estimates. Available from: <https://www.ons.gov.uk/peoplepopulationandcommunity/populationandmigration/populationestimates/datasets/lowersuperoutputareamidyearpopulationestimates>.
3. Anon. Standardization: a classic epidemiological method for the comparison of rates. *Epidemiological Bulletin.* 2002;23(3):9-12.
4. Office for National Statistics. Lower Layer Super Output Area (2011) to Clinical Commissioning Group to Local Authority District (July 2015) Lookup in England: Office for National Statistics. Available from: <http://ons.maps.arcgis.com/home/item.html?id=7de88cd2369d4006925de49e8f3f2e27>.
5. Office for National Statistics. Output Area to Lower Layer Super Output Area to Middle Layer Super Output Area to Local Authority District (December 2011) Lookup in England and Wales. Available from: <http://ons.maps.arcgis.com/home/item.html?id=baf6566ca08949c6bbd61ff81d9526da>.
6. Government DoCaL. English Indices of Deprivation 2015. Available from: <https://www.gov.uk/government/statistics/english-indices-of-deprivation-2015>.

- 1  
2  
3 7. Nomis; Office for National Statistics. Ethnic group of the usual resident population of  
4 England and Wales as at census day, 27 March 2011. Available from:  
5 <https://www.nomisweb.co.uk/census/2011/ks201ew>.
- 6  
7 8. Department of Health. Payment by Results National Tariffs 2016/17 2016. Available from:  
8 <https://www.gov.uk/government/publications/nhs-national-tariff-payment-system-201617>.
- 9  
10 9. Department of Health. Payment by Results Enhanced Tariff Option 2015/16 2015. Available  
11 from:  
12 <http://webarchive.nationalarchives.gov.uk/20161103233943/https://www.england.nhs.uk/resources/pay-syst/tariff-guide/>.
- 13  
14 10. Department of Health. Payment by Results National Tariffs 2014/15 2014. Available from:  
15 <https://www.gov.uk/government/publications/national-tariff-payment-system-2014-to-2015>.
- 16  
17 11. Department of Health. Payment by Results National Tariffs 2013/14 2013. Available from:  
18 <https://www.gov.uk/government/publications/payment-by-results-pbr-operational-guidance-and-tariffs>.
- 19  
20 12. Department of Health. Payment by Results National Tariffs 2012/13 2012. Available from:  
21 <https://www.gov.uk/government/publications/confirmation-of-payment-by-results-pbr-arrangements-for-2012-13>.
- 22  
23 13. Department of Health. Payment by Results National Tariffs 2011/12 2011. Available from:  
24 <http://webarchive.nationalarchives.gov.uk/20130507170152/https://www.gov.uk/government/publications/confirmation-of-payment-by-results-pbr-arrangements-for-2011-12>.
- 25  
26 14. Department of Health. Payment by Results National Tariffs 2010/11 2010. Available from:  
27 <https://data.gov.uk/dataset/payment-by-results-2010-11-national-tariff-information>.
- 28  
29 15. Department of Health. Payment by Results National Tariffs 2009/10 2009. Available from:  
30 [http://webarchive.nationalarchives.gov.uk/+http://www.dh.gov.uk/en/Publicationsandstatistics/Publications/PublicationsPolicyAndGuidance/DH\\_094091](http://webarchive.nationalarchives.gov.uk/+http://www.dh.gov.uk/en/Publicationsandstatistics/Publications/PublicationsPolicyAndGuidance/DH_094091).
- 31  
32 16. Department of Health. Payment by Results National Tariffs 2008/09 2008. Available from:  
33 [http://webarchive.nationalarchives.gov.uk/+http://www.dh.gov.uk/en/Managingyourorganisation/Financeandplanning/NHSFinancialReforms/DH\\_081238](http://webarchive.nationalarchives.gov.uk/+http://www.dh.gov.uk/en/Managingyourorganisation/Financeandplanning/NHSFinancialReforms/DH_081238).
- 34  
35 17. Department of Health. Payment by Results National Tariffs 2007/08 2007. Available from:  
36 [http://webarchive.nationalarchives.gov.uk/+http://www.dh.gov.uk/en/Publicationsandstatistics/Publications/PublicationsPolicyAndGuidance/DH\\_062914](http://webarchive.nationalarchives.gov.uk/+http://www.dh.gov.uk/en/Publicationsandstatistics/Publications/PublicationsPolicyAndGuidance/DH_062914).
- 37  
38 18. Grasic K, Mason AR, Street A. Paying for the quantity and quality of hospital care: the  
39 foundations and evolution of payment policy in England. Health Econ Rev. 2015;5.
- 40  
41  
42  
43  
44  
45  
46  
47  
48  
49  
50  
51  
52  
53  
54  
55  
56  
57  
58  
59  
60

# BMJ Open

**A longitudinal study of use and cost of subacromial decompression surgery: the need for effective evaluation of surgical procedures to prevent overtreatment and wasted resources.**

|                                 |                                                                                                                                                                                                                                                                                                                                                                                                                                                                                                                                                                             |
|---------------------------------|-----------------------------------------------------------------------------------------------------------------------------------------------------------------------------------------------------------------------------------------------------------------------------------------------------------------------------------------------------------------------------------------------------------------------------------------------------------------------------------------------------------------------------------------------------------------------------|
| Journal:                        | <i>BMJ Open</i>                                                                                                                                                                                                                                                                                                                                                                                                                                                                                                                                                             |
| Manuscript ID                   | bmjopen-2019-030229.R1                                                                                                                                                                                                                                                                                                                                                                                                                                                                                                                                                      |
| Article Type:                   | Research                                                                                                                                                                                                                                                                                                                                                                                                                                                                                                                                                                    |
| Date Submitted by the Author:   | 01-Jul-2019                                                                                                                                                                                                                                                                                                                                                                                                                                                                                                                                                                 |
| Complete List of Authors:       | Jones, Tim; University of Bristol, NIHR CLAHRC West<br>Carr, Andrew; University of Oxford, Nuffield Department of Orthopaedics, Rheumatology and Musculoskeletal Sciences<br>Beard, David; University of Oxford, Nuffield Department of Orthopaedics, Rheumatology and Musculoskeletal Sciences<br>Linton, Myles-Jay; University of Bristol, NIHR CLAHRC West<br>Rooshenas, Leila; University of Bristol, Population Health Sciences<br>Donovan, Jenny; University of Bristol, NIHR CLAHRC West<br>Hollingworth, William; University of Bristol, Population Health Sciences |
| <b>Primary Subject Heading</b>: | Surgery                                                                                                                                                                                                                                                                                                                                                                                                                                                                                                                                                                     |
| Secondary Subject Heading:      | Epidemiology, Health economics                                                                                                                                                                                                                                                                                                                                                                                                                                                                                                                                              |
| Keywords:                       | subacromial decompression, shoulder surgery, England, commissioning, arthroscopy                                                                                                                                                                                                                                                                                                                                                                                                                                                                                            |
|                                 |                                                                                                                                                                                                                                                                                                                                                                                                                                                                                                                                                                             |

SCHOLARONE™  
Manuscripts



1  
2  
3 1  
4  
5 2 **Title:** A longitudinal study of use and cost of subacromial decompression surgery: the need for  
6 3 effective evaluation of surgical procedures to prevent overtreatment and wasted resources.  
7  
8 4  
9

10 5 **Authors:** Tim Jones<sup>1,2</sup>, Andrew Carr<sup>3</sup>, David Beard<sup>3</sup>, Myles-Jay Linton<sup>1,2</sup>, Leila Rooshenas<sup>2</sup>, Jenny L.  
11 6 Donovan<sup>1,2</sup>, and William Hollingworth<sup>1,2</sup>  
12  
13 7  
14  
15 8  
16

17 9 <sup>1</sup> NIHR CLAHRC West, University Hospitals Bristol NHS Foundation Trust, Bristol, BS1 2NT, UK

18  
19 10 <sup>2</sup> Department of Population Health Sciences, Bristol Medical School, University of Bristol, BS8 2PS,  
20 11 UK

21  
22 12 <sup>3</sup> Nuffield Department of Orthopaedics, Rheumatology, and Musculoskeletal Sciences (NDORMS),  
23 13 NIHR Biomedical Research Centre, Botnar Research Centre, University of Oxford, Oxford, UK  
24  
25 14  
26  
27 15  
28

29 16 **Corresponding author:**

30 17 Tim Jones  
31 18 Senior Research Associate  
32 19 NIHR CLAHRC West,  
33 20 9<sup>th</sup> Floor Whitefriars,  
34 21 Lewin's Mead  
35 22 Bristol, BS1 2NT  
36 23 United Kingdom  
37 24

38 25 Tel: ++44 (0)117 342 1265

39 26 [Timothy.Jones@bristol.ac.uk](mailto:Timothy.Jones@bristol.ac.uk)  
40 27  
41 28  
42 29  
43 30  
44 31  
45 32  
46 33

47 34 **Word count [3,037]**  
48 35  
49 36  
50 37  
51 38  
52 39  
53 40  
54 41  
55 42  
56 43  
57 44  
58 45  
59 46  
60 47

61 48 **Keywords:**

62 49 Subacromial decompression; arthroscopy; shoulder surgery; England; commissioning  
63 50  
64 51  
65 52  
66 53  
67 54  
68 55  
69 56  
70 57  
71 58  
72 59  
73 60

1  
2  
3 34 **ABSTRACT**  
4  
5 35  
6

7 36 **Objectives:** To illustrate the need for better evaluation of surgical procedures, we investigated the  
8  
9 37 use and cost of subacromial decompression in England over the last decade compared with other  
10  
11 38 countries and explored how this related to the conduct and outcomes of randomised, placebo-  
12  
13 39 controlled clinical trials.

14 40 **Design:** Longitudinal observational study using Hospital Episode Statistics linked to Payment by  
15  
16 41 Results tariffs in England, 2007/8-2016/17.

17  
18 42 **Setting:** Hospital care in England, Finland, New York State USA, Florida State USA, and Western  
19  
20 43 Australia.

21  
22 44 **Participants:** Patients with subacromial shoulder pain.

23  
24 45 **Interventions:** Subacromial decompression.

25  
26 46 **Main outcome measures:** National procedure rates, costs, and variation between clinical  
27  
28 47 commissioning groups (CCGs) in England.

29  
30 48 **Results:** Without robust clinical evidence, the use of subacromial decompression in England  
31  
32 49 increased by 91% from 15,112 procedures (30 per 100,000 population) in 2007/8, to 28,802  
33  
34 50 procedures (52 per 100,000 population) in 2016/17, costing over £125 million per year. Rates of use  
35  
36 51 of subacromial decompression are even higher internationally: Finland (131 per 100,000 in 2011),  
37  
38 52 Florida State (130 per 100,000 in 2007), Western Australia (115 per 100,000 in 2013), and New York  
39  
40 53 State (102 per 100,000 in 2006). Two randomised placebo-controlled trials have recently (2018)  
41  
42 54 shown the procedure to be no more effective than placebo or conservative approaches. Health  
43  
44 55 systems appear unable to avoid the rapid widespread use of procedures of unknown effectiveness,  
45  
46 56 and methods for ceasing ineffective treatments are under-developed.

47  
48 57 **Conclusions:** Without good evidence, nearly 30,000 subacromial decompression procedures have  
49  
50 58 been commissioned each year in England, costing over £1 billion since 2007/8. Even higher rates of  
51  
52 59 procedures are carried out in countries with less regulated health systems. High quality randomised  
53  
54 60 trials need to be initiated before widespread adoption of promising operative procedures to avoid  
55  
56  
57  
58  
59  
60

1  
2  
3  
4  
5  
6  
7  
8  
9  
10  
11  
12  
13  
14  
15  
16  
17  
18  
19  
20  
21  
22  
23  
24  
25  
26  
27  
28  
29  
30  
31  
32  
33  
34  
35  
36  
37  
38  
39  
40  
41  
42  
43  
44  
45  
46  
47  
48  
49  
50  
51  
52  
53  
54  
55  
56  
57  
58  
59  
60

61 over-treatment and wasted resources, and methods to prevent or desist the use of ineffective  
62 procedures need to be expedited.

For peer review only

1  
2  
3 63 **ARTICLE SUMMARY**  
4  
5

6 64 **Strengths and Limitations of this Study**  
7  
8

- 9  
10 65 • Our study used a national, longitudinal dataset over a 10-year period covering all NHS  
11  
12 66 secondary care providers in England, and private provision for NHS-funded patients.  
13  
14 67 • Hospital Episode Statistics are linked to hospital payments, which is a strong incentive to  
15  
16 68 provide complete data, and allowed us to explore costs of subacromial decompression in  
17  
18 69 England.  
19  
20 70 • We provide international comparisons of the use of subacromial decompression surgery.  
21  
22  
23 71 • Our data are from 2007/08 onwards, so we under-estimate the amount spent on  
24  
25 72 subacromial decompression prior to publication of major clinical trial results (CSAW and  
26  
27 73 FIMPACT).  
28  
29  
30 74 • There may be additional factors influencing surgery rates which we have not controlled for  
31  
32 75 (e.g. private health insurance coverage).  
33  
34  
35  
36  
37  
38  
39  
40  
41  
42  
43  
44  
45  
46  
47  
48  
49  
50  
51  
52  
53  
54  
55  
56  
57  
58  
59  
60

## 76 INTRODUCTION

77 Health and social care services are 'straining at the seams' following increasing demand for services  
78 from an ageing population with more complex needs.<sup>1</sup> In England, over 200 Clinical Commissioning  
79 Groups (CCGs) have a budget to purchase health services for their local populations.<sup>2</sup> Hospital care  
80 currently accounts for 48.5% (£74 billion) of government health expenditure in the UK.<sup>3</sup> It is vital that  
81 commissioners make evidence-based decisions to maximise the effectiveness of this hospital care  
82 budget to benefit the overall health of the population.

83 Medicines must be licensed for use for a particular condition, requiring pharmaceutical companies  
84 to provide evidence of effectiveness from clinical trials to relevant agencies such as the Medicines  
85 and Healthcare products Regulatory Agency (MHRA) in the UK,<sup>4</sup> European Medicines Agency (EMA)  
86 in the EU, or the Food and Drug Administration (FDA) in the United States.<sup>5</sup> In the UK, the National  
87 Institute for Health and Care Excellence (NICE) also evaluates the cost-effectiveness of many  
88 medicines and does not recommend those which do not provide value. These regulatory processes  
89 have their limitations,<sup>6</sup> but require robust evidence for the introduction of new treatments. The  
90 quality of evidence required to introduce new surgical procedures is not as strict as for medicines,<sup>4,5</sup>  
91 in part because no specific product such as a drug or device is involved; it can be difficult to  
92 categorise procedures as 'new' rather than modifications; and outcomes may depend on the skill of  
93 the practitioner as well as the procedure itself.<sup>4</sup> Once introduced, use of procedures can spread by  
94 clinical consensus,<sup>5</sup> and established practice and clinical evidence often take many years to be  
95 updated.<sup>7,8</sup>

96 NHS England has recently commissioned a consultation regarding the use of 17 hospital procedures,<sup>9</sup>  
97 one of which is subacromial decompression for shoulder pain. Shoulder pain is common, with a  
98 lifetime prevalence of up to 66.7%<sup>10</sup>. Most of these cases (up to 70%) are related to rotator cuff  
99 tears or subacromial pain.<sup>11</sup> Subacromial pain is often considered to be caused by bony 'spurs'  
100 forming on the acromion, part of the shoulder blade, leading to inflammation in the surrounding

1  
2  
3 101 bursa and tendons.<sup>12 13</sup> Subacromial decompression removes the bony spur on the acromion and  
4  
5 102 releases the coracohumeral ligament.<sup>13 14</sup> There has been a rapidly increasing use of subacromial  
6  
7 103 decompression in England, with over 21,000 procedures carried out in 2009/10.<sup>13</sup>  
8  
9  
10  
11 104 Several randomised controlled trials (RCTs) since the early 1990s have compared subacromial  
12  
13 105 decompression to non-operative treatment (e.g. exercise) for shoulder pain and found no evidence  
14  
15 106 of effectiveness.<sup>15-17</sup> Two recent multi-centre RCTs including a placebo surgery arm have further  
16  
17 107 questioned the effectiveness of subacromial decompression for shoulder pain.<sup>18 19</sup> The CSAW trial,<sup>12</sup>  
18  
19 108 <sup>18</sup> recruiting in England from 2012 to 2015, compared arthroscopic subacromial decompression  
20  
21 109 surgery, placebo (investigational shoulder arthroscopy), and no treatment.<sup>18</sup> It found no difference  
22  
23 110 in shoulder function after six months between the arthroscopic subacromial decompression group  
24  
25 111 and the arthroscopy only (placebo) group, with a small, non-clinically significant benefit of surgery  
26  
27 112 over the no treatment control. The FIMPACT trial,<sup>19</sup> recruiting in Finland from 2005 to 2013,  
28  
29 113 compared subacromial decompression with placebo surgery and exercise therapy and echoed the  
30  
31 114 results of CSAW, extending them to two years follow-up. A recent Cochrane review including CSAW,  
32  
33 115 FIMPACT, and earlier RCTs, found high-certainty evidence that subacromial decompression does not  
34  
35 116 improve pain, function, or health-related quality of life.<sup>20</sup> This seriously questions whether the  
36  
37 117 resources invested in subacromial decompression represent good value for money for the NHS. As a  
38  
39 118 result, a recent BMJ article made a strong recommendation against subacromial decompression  
40  
41 119 surgery for chronic shoulder pain.<sup>21</sup>

42  
43 120 In this study we use subacromial decompression for shoulder pain as an example to explore the  
44  
45 121 relationship between evolving evidence and clinical practice for hospital procedures, including how  
46  
47 122 many procedures were performed over the last 10 years and how much money was spent before  
48  
49 123 RCT evidence raised questions about the procedure's value; how procedure rates compare to other  
50  
51 124 countries; and how the NHS might reduce the numbers of these procedures.  
52  
53  
54  
55  
56  
57  
58  
59  
60

1  
2  
3 126 **METHODS**  
4  
5

6 127 **Data sources**  
7  
8  
9

10 128 Subacromial decompression procedures were identified using the 'admitted patient care' hospital  
11 episode statistics (HES-APC). HES is a routinely collected dataset that records all episodes of care  
12 provided to patients admitted (day case or inpatient) to NHS hospitals in England and NHS-funded  
13 patients treated in the independent sector.<sup>22 23</sup> Each episode in HES represents a period of care  
14 under one consultant team. Up to 20 diagnoses are recorded per episode using the International  
15 Classification of Diseases (ICD) version 10. Up to 24 clinical procedures per episode may be recorded  
16 using Office of Population, Censuses and Surveys (OPCS) (fourth revision) codes. HES also includes  
17 the Lower Super Output Area (LSOA) of residence for each patient.<sup>24</sup>  
18  
19  
20  
21  
22  
23  
24  
25  
26  
27

28 136 **Identifying subacromial decompression**  
29  
30

31 137 We extracted anonymised, individual episodes in the HES-APC (2007/8 to 2016/17) dataset. We used  
32 diagnosis and procedure codes<sup>13</sup> (Figure 1) to identify subacromial decompression. A small number  
33 of patients received multiple shoulder procedure episodes on the same day (0.3% of all episodes).  
34 When these were for the same procedure with the same laterality (0.25% of all episodes), we  
35 assumed coding error duplication so excluded the episodes. If a procedure was marked as bilateral  
36 (0.6%), this was counted as two procedures. We excluded patients who were not resident in  
37 England.  
38  
39  
40  
41  
42  
43  
44  
45  
46  
47

48 144 **Estimating procedure rates**  
49  
50

51 145 National trends over time were estimated using directly standardised procedure rates<sup>25</sup> (per  
52 100,000 population), with the population of England in 2016 as our standard population. For  
53 comparison of smaller areas, we estimated indirectly standardised rates<sup>26</sup> per 100,000 population,  
54  
55  
56  
57  
58  
59  
60

1  
2  
3 148 using the same standard population, and adjusting for deprivation and ethnicity (see Appendix A for  
4  
5 149 more details).

### 9 150 **Estimating procedure costs**

10  
11  
12 151 Costs were estimated for each financial year by linking Healthcare Resource Group (HRG) codes for  
13  
14 152 each admission in HES with the Department of Health Payment by Results National Tariffs for the  
15  
16 153 appropriate financial year;<sup>27-36</sup> see Appendix A for more details.

### 19 154 **International comparisons**

20  
21  
22  
23 155 A search of Medline and the Cumulative Index of Nursing and Allied Health (CINAHL) databases was  
24  
25 156 conducted for the terms “acromioplasty” or “subacromial decompression” in conjunction with  
26  
27 157 “incidence” or “prevalence” or “epidemiology”. One author (TJ) screened the results for articles  
28  
29 158 including rates of subacromial decompression contemporary with our data, and further screened  
30  
31 159 cited articles within included studies, as well as articles which cited included studies.

32  
33  
34  
35 160 All statistical analyses were conducted using Stata/MP 14.2 for Windows and we mapped variation  
36  
37 161 in procedure rates across England in 2016/17 using ArcGIS ArcMap 10.5.1 for Desktop.

### 39 162 **Patient and public involvement**

40  
41  
42  
43 163 There was no patient involvement in the design or conduct of this study. Two patients involved in  
44  
45 164 the CSAW trial reviewed this manuscript; they were interested by the results and the cost-focused  
46  
47 165 perspective.

48  
49  
50  
51 166

52  
53  
54 167

55  
56  
57 168



1  
2  
3 **169 RESULTS**  
4  
5

6 **170 The use of subacromial decompression in England**  
7  
8

9  
10 171 There were 15,112 subacromial decompression procedures (30 per 100,000 population) in 2007/8,  
11  
12 172 rising to 28,802 procedures (52 per 100,000 population) in 2016/17 (Figure 2), excluding those done  
13  
14 173 in combination with rotator cuff repair. This represents a 91% increase in the number of subacromial  
15  
16 174 decompressions over 10 years, with 266,692 procedures carried out in total. Most of this increase  
17  
18 175 took place before 2011/12, and procedure rates have slightly decreased between 2011/12 and  
19  
20 176 2016/17. Whilst the gender balance and age of those having shoulder surgery have remained steady  
21  
22 177 over the last decade, the proportion of procedures conducted as day cases, using arthroscopy,  
23  
24 178 and/or by independent (i.e. non-NHS) providers, have all increased (Table 1).  
25  
26  
27  
28  
29

30 180 Table 1: Descriptive information for subacromial decompression patients, 2007/08 and 2016/17

|                         | 2007/08       | 2016/17       |
|-------------------------|---------------|---------------|
| Procedure Count         | 15,112        | 28,802        |
| %women                  | 51.0          | 52.0          |
| Age in years (SD)       | 54.94 (12.55) | 54.89 (12.39) |
| % Arthroscopy           | 39.0          | 94.1          |
| % Independent Providers | 2.4           | 31.9          |
| % Day-case              | 51.0          | 79.3          |

40 181

41 182

42  
43 **183 The cost of subacromial decompression in England**  
44  
45

46 184 In 2016/17, the median cost of an elective admission for subacromial decompression alone was  
47  
48 185 £4,476. The cost of subacromial decompression in England rose from £33 million in 2007/08 to £125  
49  
50 186 million in 2016/17. Over the 10-year period between 2007/8 and 2016/17 just under £1.1 billion was  
51  
52 187 spent on subacromial decompression (excluding procedures done in combination with rotator cuff  
53  
54 188 repair).  
55  
56  
57

58 **189 Variation in use of subacromial decompression in England**  
59  
60

1  
2  
3 190 In 2016/17 there was substantial variation in procedure rates between CCGs, after adjusting for age,  
4  
5 191 sex, deprivation, and ethnicity profiles (Figure 3). The map demonstrates pockets of very high use  
6  
7 192 (>150% of the expected rate), for example in the Reading area, Wiltshire, and East Lincolnshire.  
8  
9  
10 193 There were also areas where procedure rates were less than 50% of the expected rate, such as in  
11  
12 194 Worcestershire, Gloucestershire, Swindon, and North Norfolk. In 2016/17 the ratio of procedure  
13  
14 195 rates between a 'high use' CCG at the 90<sup>th</sup> percentile and a 'low use' CCG at the 10<sup>th</sup> percentile was  
15  
16 196 2.7 (95% CI: 2.2-3.4). This ratio is lower than the 2007/8 ratio of 3.6 (95% CI: 2.2-6.1), although  
17  
18  
19 197 overlapping confidence intervals suggest this may be due to chance variation; see Table 2.  
20  
21

22 198 Table 2: 90/10 percentile ratios for directly age-sex standardised rates of subacromial  
23 199 decompression by CCG, England, 2007/8-2016/17

| Year    | 90th Pct | 10th Pct | 90/10 Ratio (95% CI*) |
|---------|----------|----------|-----------------------|
| 2007/08 | 53       | 15       | 3.6 (2.2-6.1)         |
| 2008/09 | 55       | 16       | 3.3 (2.1-5.2)         |
| 2009/10 | 72       | 27       | 2.6 (2.0-3.5)         |
| 2010/11 | 87       | 33       | 2.6 (1.9-3.6)         |
| 2011/12 | 89       | 36       | 2.5 (2.0-3.1)         |
| 2012/13 | 90       | 33       | 2.7 (2.0-3.7)         |
| 2013/14 | 88       | 34       | 2.6 (2.1-3.3)         |
| 2014/15 | 89       | 33       | 2.7 (2.0-3.7)         |
| 2015/16 | 81       | 33       | 2.5 (1.4-4.3)         |
| 2016/17 | 83       | 30       | 2.7 (2.2-3.4)         |

39 200 \*Confidence intervals for rate ratios<sup>37</sup>  
40 201

## 42 202 International comparison of rates of subacromial decompression

43  
44  
45  
46 203 Table 3 shows rates of subacromial decompression in the most recent year available from England,  
47  
48 204 Finland, Florida State, New York State, and Western Australia. Rates in England were lower, often  
49  
50 205 only half, that of other countries. For subacromial decompression alone, the procedure rates were  
51  
52 206 lower in England (52 per 100,000 in 2016/17) than Western Australia (roughly 115 per 100,000 in  
53  
54 207 2013),<sup>38</sup> Florida State (130 per 100,000 in 2007),<sup>39</sup> and Finland (131 per 100,000 in 2011).<sup>40</sup>  
55  
56  
57  
58  
59  
60

Figure 2 compares trends in rates of subacromial decompression in England, Finland, Florida State, New York State, and Western Australia. The rate of increase for subacromial decompression observed in our study (x2 between 2007/8 and 2016/17) was similar to Western Australia (x2 between 2001 and 2013),<sup>38</sup> Finland (x2.2 between 1998 and 2007),<sup>40</sup> and New York State (x2.5 between 1996 and 2006),<sup>41</sup> but lower than Florida State (x4.4 between 2003 and 2007).<sup>39</sup> The use of subacromial decompression in Finland peaked in 2007 and has since been declining, at least in publicly-funded hospitals, which has been attributed to accumulating evidence that it is no more clinically effective than non-surgical alternatives.<sup>40</sup>

Table 3: International comparisons of age-sex-standardised rates of subacromial decompression

| Article                | Country           | Data Year | SAD Rate (per 100,000 population) |
|------------------------|-------------------|-----------|-----------------------------------|
| Thorpe et al. (2016)   | Western Australia | 2013      | ~115                              |
| Paloneva et al. (2015) | Finland           | 2011      | 131                               |
| Vitale et al. (2010)   | New York State    | 2006      | 102                               |
| Iyengar et al. (2014)  | Florida State     | 2007      | ~130                              |
| Our Data               | England           | 2016/17   | 52                                |

Notes: Numbers for Thorpe et al (2016) and Iyengar et al. (2014) were estimated from a graph; New York State data is for subacromial decompression with/without rotator cuff repair; SAD = Subacromial Decompression<sup>38-41</sup>

1  
2  
3 228 **DISCUSSION**  
4  
5

6 229 **Statement of principal findings**  
7  
8

9 230 NHS England carries out nearly 30,000 subacromial decompression operations per year, at an annual  
10  
11 231 cost of over £125 million. Between 2007/08 and 2016/17, 266,692 subacromial decompression  
12  
13 232 procedures were carried out in England costing nearly £1.1 billion, before the addition of the CSAW  
14  
15 233 and FIMPACT placebo-controlled trial results to the existing evidence prompted serious questions  
16  
17 234 about the clinical benefit of the procedure. Rates of subacromial decompression alone in England  
18  
19 235 have gradually declined since 2011/12, although an increasing number are carried out in  
20  
21 236 combination with rotator cuff repair. There was large variation between CCGs in England, even after  
22  
23 237 adjustment for demographic variables, with 'high-use' areas carrying out nearly three times as many  
24  
25 238 procedures as 'low-use' areas. Procedure rates in England were notably lower than other countries,  
26  
27 239 arguing against any levelling of procedure rates being due to saturation of 'demand' for shoulder  
28  
29 240 surgery.  
30  
31  
32  
33  
34

35 241 **Strengths and weaknesses of the study**  
36  
37

38 242 Our study used a national, longitudinal dataset over a 10-year period covering all NHS secondary  
39  
40 243 care providers in England. Hospital Episode Statistics are administrative rather than specifically  
41  
42 244 designed for research. However, HES is also linked to payments for hospitals, which is a strong  
43  
44 245 incentive to provide complete data, and allowed us to produce what we believe is the first  
45  
46 246 exploration of costs associated with subacromial decompression in England. Payment by results  
47  
48 247 tariffs are based on average national costs and may not reflect precise costs for each hospital  
49  
50 248 admission. Population denominators, and linkage to the indices of multiple deprivation and census  
51  
52 249 ethnicity data, allowed us to investigate trends and variations in procedure rates standardised on  
53  
54 250 age, sex, deprivation and ethnicity. HES data records patients' area of residence, so we compared  
55  
56 251 procedure rates based on place of residence rather than place of treatment. There may be other  
57  
58  
59  
60

1  
2  
3 252 factors influencing rates which we have not controlled for (e.g. private health insurance coverage).  
4  
5 253 HES does not record procedures which are privately funded and provided, meaning our surgery rates  
6  
7 254 are an under-estimate of the population rate. We only provide cost data from 2007/08 onwards, so  
8  
9  
10 255 we under-estimate the amount spent on subacromial decompression prior to publication of the  
11  
12 256 CSAW and FIMPACT trial results. International estimations of procedure rates do not use identical  
13  
14 257 definitions of procedures and inclusion/exclusion criteria, but should be broadly comparable.  
15  
16

### 17 258 **Implications for policymakers and clinicians**

18  
19  
20  
21 259 NHS England spent over £1 billion on subacromial decompression during the last 10 years without  
22  
23 260 having compelling evidence of clinical effectiveness or cost-effectiveness. Rates of subacromial  
24  
25 261 decompression were already rising rapidly from 2000/01 onwards.<sup>13</sup> It seems plausible that  
26  
27 262 increasing awareness of concerns about the effectiveness of subacromial decompression surgery<sup>15-17</sup>  
28  
29 263 and well-known recruitment to the CSAW trial tempered the rise in use of this surgery in England,  
30  
31 264 otherwise more may have been spent. The CSAW trial involved 51 surgeons in 30 centres  
32  
33 265 throughout the UK and was widely advertised and discussed amongst shoulder surgeons and  
34  
35 266 shoulder physiotherapists. Extensive consultation was carried out by the trial team prior to and  
36  
37 267 during the trial, including presentations at national meetings surveys and visits to individual  
38  
39 268 surgeons and centres.<sup>42</sup> A similar plateau/decrease in procedures was observed in Finland after the  
40  
41 269 commencement of the FIMPACT study in 2005 which involved only 3 centres in Finland (Figure 2). It  
42  
43 270 is likely that awareness of a potential lack of effectiveness of subacromial decompression had been  
44  
45 271 growing in the years before CSAW and FIMPACT, based on earlier trial results.<sup>15-17</sup> However, it took  
46  
47 272 well over a decade of increasing subacromial decompression use for clinical trial groups to run high  
48  
49 273 quality, low risk-of-bias, placebo-controlled studies randomising a few hundred patients (313  
50  
51 274 patients for CSAW<sup>18</sup> and 210 in FIMPACT<sup>19</sup>) to investigate its effectiveness. This delay may be due to  
52  
53 275 perceived difficulties in recruiting patients to surgical trials with non-surgical comparators (e.g.  
54  
55 276 UKUFF<sup>43</sup>), as well as known challenges of conducting surgical RCTs.<sup>44</sup> Methods to optimise  
56  
57  
58  
59  
60

1  
2  
3 277 recruitment, as used in CSAW and other trials,<sup>45</sup> are available to support the completion of such  
4  
5 278 'difficult' trials;<sup>46</sup> this should not now be a barrier to rapidly initiating trials to provide robust  
6  
7 279 evidence about surgical interventions before they become widespread. More time is needed to see  
8  
9  
10 280 the longer-term impact of publication of the CSAW and FIMPACT results on subacromial  
11  
12 281 decompression rates, both in the UK and internationally.

13  
14  
15 282 The National Institute for Health and Care Excellence (NICE) requires evidence of cost-effectiveness  
16  
17 283 to recommend new medicines to be paid for by the NHS. It is unclear why the bar for introducing  
18  
19 284 expensive surgical procedures should be significantly lower. A balance needs to be struck between  
20  
21 285 supporting innovation in surgical procedures and preventing unnecessary treatment. New initiatives  
22  
23 286 such as IDEAL (Idea, Development, Exploration, Assessment, Long-term Follow-up, Improving the  
24  
25 287 Quality of Research in Surgery)<sup>47</sup> aim to provide such a regulatory framework for introducing new  
26  
27 288 interventions.

28  
29  
30  
31  
32 289 It is important that new evidence is disseminated quickly without causing inequities in access to  
33  
34 290 care. NICE published an updated Clinical Knowledge Summary for shoulder pain in April 2017<sup>48</sup>  
35  
36 291 incorporating information from a commissioning guide published by the Royal College of Surgeons.<sup>49</sup>  
37  
38 292 This recommended a range of conservative treatments from physiotherapy to corticosteroid  
39  
40 293 injections, before surgery. However, many CCGs introduced their own criteria-based policies for  
41  
42 294 access to shoulder surgery (e.g. through Individual Funding Requests)<sup>50</sup>, essentially meaning that  
43  
44 295 commissioners would only pay providers for surgery under particular circumstances. These were  
45  
46 296 implemented at different times and with different details, underlining the extent to which  
47  
48 297 insufficient evidence may drive clinical and commissioner uncertainty,<sup>51</sup> and possibly leading to the  
49  
50 298 wide variations shown across CCGs in our data. Where scientific evidence is applicable nationally or  
51  
52 299 internationally, it would seem more efficient and appropriate to apply national policies to inform  
53  
54 300 optimal use and encourage further research. There is a need to improve techniques for empirically-  
55  
56 301 informed policy development in collaboration with relevant stakeholders.<sup>52 53</sup>  
57  
58  
59  
60

1  
2  
3 302 Despite the criticisms provided above, England has lower rates of shoulder surgery than other  
4  
5 303 countries. The reasons for this are uncertain but could be due to differences in the health systems  
6  
7 304 (e.g. GP gatekeeping of services), access to surgery and hospital reimbursement. Additionally, the  
8  
9  
10 305 National Institute of Health Research in England has funded major clinical trials on shoulder  
11  
12 306 surgery,<sup>18 43</sup> as well as other procedures,<sup>54 55</sup> and is about to fund a further clinical trial to compare  
13  
14 307 surgery with placebo surgery for partial thickness rotator cuff tears.<sup>56</sup> Whilst the UK's national  
15  
16 308 regulatory processes are imperfect, they may provide examples to learn from. However, these  
17  
18 309 processes did not sufficiently constrain the use of subacromial decompression, a procedure later  
19  
20  
21 310 found to have little clinical benefit.

22  
23  
24 311 There have been several other controversies regarding the lack of effectiveness of procedures which  
25  
26 312 have become commonplace. One example is the use of stents to open narrowed arteries for  
27  
28 313 treatment of stable angina (chest pain). Around half a million people receive stents for stable angina  
29  
30 314 each year in the US and Europe,<sup>57</sup> but a recent (RCT) including a placebo intervention found no  
31  
32 315 difference in chest pain outcomes between inserting a stent and using standard medications.<sup>58</sup>  
33  
34 316 Another example is arthroscopy to clean out the knee joint, on which around \$4 billion is spent each  
35  
36 317 year in the US.<sup>59</sup> Recent RCTs,<sup>60 61</sup> including one using a placebo procedure as a comparison,<sup>61</sup> found  
37  
38 318 no evidence of effectiveness to justify the spending. Whilst we use subacromial decompression as an  
39  
40 319 example in this study, our observations are likely to apply to interventional procedures more  
41  
42 320 generally.

#### 43 44 45 46 47 321 **Unanswered questions and future research**

48  
49  
50  
51 322 The example of subacromial decompression highlights that, in the absence of rigorous evaluation,  
52  
53 323 costly interventions can proliferate over a long period of time. To maximise limited resources, it is  
54  
55 324 vital that methods are developed to identify promising procedures early and commission trials to  
56  
57 325 examine their value, as well as identify existing health technologies that may be ineffective, leading  
58  
59 326 to over-treatment and wasting of resources.

1  
2  
3 327 There is an opportunity for a natural experiment exploring the impact of the results of the CSAW and  
4  
5 328 FIMPACT trials<sup>18 19</sup> on the development of CCG policies, national guidelines, and clinical decision-  
6  
7 329 making with surgeons and patients. It is arguable that we should now see swift reductions in the use  
8  
9  
10 330 of subacromial decompression; research studies could help enhance the transfer of knowledge from  
11  
12 331 trials into clinical practice.

### 15 332 **Conclusions**

17  
18 333 NHS England pays for nearly 30,000 shoulder subacromial decompression procedures each year at  
19  
20 334 an annual cost of over £125 million, with little evidence that they are effective or cost-effective. The  
21  
22 335 rates of this operation in other countries are even higher. This raises serious questions around the  
23  
24 336 regulatory and professional processes governing the adoption and widespread use of surgical  
25  
26 337 interventions. High quality RCTs should be funded early to examine the effectiveness and cost-  
27  
28 338 effectiveness of expensive procedures using methods to optimise recruitment, and robust processes  
29  
30 339 should be developed to reduce the use of ineffective procedures.

31  
32  
33  
34  
35 340

36  
37  
38 341

39  
40  
41 342

42  
43  
44 343

45  
46  
47 344

48  
49  
50 345

51  
52  
53 346

54  
55  
56 347

57  
58  
59 348

60



1  
2  
3 349 **Author Statement**  
4  
5

6 350 This publication is the work of the authors, who serve as guarantors for the contents of this paper. TJ  
7  
8 351 contributed to study design, data cleaning, data analysis, interpretation of results and writing the  
9  
10 352 manuscript. MJL contributed to study design, data cleaning, interpretation of results and writing the  
11  
12 353 manuscript. AC contributed to study design, interpretation of results and writing the manuscript. DB,  
13  
14 354 LR, and JD contributed to interpretation of results and writing the manuscript. WH contributed to  
15  
16 355 study conceptualization, study design, interpretation of results and writing the manuscript. TJ had  
17  
18 356 full access to the data in the study and takes responsibility for the integrity of the data and the  
19  
20 357 accuracy of the data analysis.  
21  
22

23  
24  
25 358 **Acknowledgements**  
26

27 359 The authors would like to thank two patients from the CSAW trial, Carol Brennan and Dair Farrer-  
28  
29 360 Hockley, who took the time to read and comment on this manuscript.  
30  
31

32  
33 361 **Funding**  
34

35 362 This research was funded by the National Institute for Health Research (NIHR) Collaboration for  
36  
37 363 Leadership in Applied Health Research and Care West (NIHR CLAHRC West). The views expressed in  
38  
39 364 this article are those of the author(s) and not necessarily those of the NHS, the NIHR, or the  
40  
41 365 Department of Health and Social Care.  
42  
43  
44

45 366 **Ethnical Approval**  
46

47  
48 367 We were provided with routinely-collected Hospital Episode Statistics data under licence from NHS  
49  
50 368 Digital (DARS-NIC-17875-X7K1V). The licence allows us to use the information under Section 261 of  
51  
52 369 the Health and Social Care Act 2012, 2(b)(ii): "after taking into account the public interest as well as  
53  
54 370 the interests of the relevant person, considers that it is appropriate for the information to be  
55  
56 371 disseminated".  
57  
58  
59

60 372 **Data Sharing**

1  
2  
3 373 This study is based in part on data from the Hospital Episode Statistics (HES) obtained under licence  
4  
5 374 (DARS-NIC-17875-X7K1V) from NHS Digital (previously the Health and Social Care Information  
6  
7 375 Centre); *Copyright © 2018, re-used with the permission of The Health & Social Care Information*  
8  
9 376 *Centre. All rights reserved.* The data are provided by patients and collected by the NHS as part of  
10  
11 377 their care and support. HES data can be accessed via NHS Digital:  
12  
13  
14 378 <https://digital.nhs.uk/services/data-access-request-service-dars>

### 17 379 **Transparency**

20 380 The manuscript's guarantor (TJ) affirms that the manuscript is an honest, accurate, and transparent  
21  
22 381 account of the study being reported; that no important aspects of the study have been omitted; and  
23  
24 382 that any discrepancies from the study as originally planned have been explained.

### 27 383 **Competing Interests**

30 384 All authors have completed the ICMJE uniform disclosure form at [www.icmje.org/coi\\_disclosure.pdf](http://www.icmje.org/coi_disclosure.pdf)  
31  
32 385 and declare: TJ and JD had financial support from NIHR CLAHRC West for the submitted work; no  
33  
34 386 financial relationships with any organisations that might have an interest in the submitted work in  
35  
36 387 the previous three years; no other relationships or activities that could appear to have influenced  
37  
38 388 the submitted work.

41 389  
42 390  
43 391  
44 392  
45 393  
46 394  
47 395  
48 396  
49 397  
50 398  
51 399  
52 400  
53 401  
54 402  
55 403  
56 404

## REFERENCES

1. Care Quality Commission. The state of health care and adult social care in England 2017 [Available from: [http://www.cqc.org.uk/sites/default/files/20171017\\_stateofcare1617\\_report.pdf](http://www.cqc.org.uk/sites/default/files/20171017_stateofcare1617_report.pdf).
2. NHS Clinical Commissioners. About CCGs 2017 [Available from: <https://www.nhscc.org/ccgs/> accessed 3rd November 2017.
3. Office for National Statistics. UK Health Accounts: 2016 2018 [Available from: <https://www.ons.gov.uk/peoplepopulationandcommunity/healthandsocialcare/healthcaresystem/bulletins/ukhealthaccounts/2016>.
4. Campbell B. Regulation and safe adoption of new medical devices and procedures. *Brit Med Bull* 2013;107(1):5-18. doi: 10.1093/bmb/ldt022
5. Darrow JJ. Explaining the absence of surgical procedure regulation. *Cornell Journal of Law and Public Policy* 2017;27(1):189-206.
6. Hollingworth W, Jones T, Reeves BC, et al. A longitudinal study to assess the frequency and cost of antivasular endothelial therapy, and inequalities in access, in England between 2005 and 2015. *Bmj Open* 2017;7(10) doi: 10.1136/bmjopen-2017-018289
7. Tatsioni A, Bonitsis NG, Ioannidis JPA. Persistence of contradicted claims in the literature. *Jama-J Am Med Assoc* 2007;298(21):2517-26. doi: DOI 10.1001/jama.298.21.2517
8. Jevne J. The sexy scalpel: unnecessary shoulder surgery on the rise. *Brit J Sport Med* 2015;49(16):1031-32. doi: 10.1136/bjsports-2015-094589
9. NHS England, NHS Clinical Commissioners, Academy of Medical Royal Colleges, et al. Evidence-Based Interventions: Consultation Document: NHS England, 2018.
10. Luime JJ, Koes BW, Hendriksen IJM, et al. Prevalence and incidence of shoulder pain in the general population; a systematic review. *Scand J Rheumatol* 2004;33(2):73-81. doi: 10.1080/03009740310004667
11. Mitchell C, Adebajo A, Hay E, et al. Shoulder pain: diagnosis and management in primary care. *Brit Med J* 2005;331(7525):1124-28a. doi: DOI 10.1136/bmj.331.7525.1124
12. Beard D, Rees J, Rombach I, et al. The CSAW Study (Can Shoulder Arthroscopy Work?) - a placebo-controlled surgical intervention trial assessing the clinical and cost effectiveness of arthroscopic subacromial decompression for shoulder pain: study protocol for a randomised controlled trial. *Trials* 2015;16 doi: 10.1186/s13063-015-0725-y
13. Judge A, Murphy RJ, Maxwell R, et al. Temporal trends and geographical variation in the use of subacromial decompression and rotator cuff repair of the shoulder in England. *Bone Joint J* 2014;96b(1):70-74. doi: 10.1302/0301-620x.96b1.32556
14. Chalmers PN, Romeo AA. Arthroscopic Subacromial Decompression and Acromioplasty. *Jbjs Essent Surg Tec* 2016;6(2) doi: 10.2106/JBJS.ST.O.00011
15. Brox JI, Staff PH, Ljunggren AE, et al. Arthroscopic surgery compared with supervised exercises in patients with rotator cuff disease (stage II impingement syndrome). *BMJ* 1993;307(6909):899-903. doi: 10.1136/bmj.307.6909.899 [published Online First: 1993/10/09]
16. Haahr JP, Ostergaard S, Dalsgaard J, et al. Exercises versus arthroscopic decompression in patients with subacromial impingement: a randomised, controlled study in 90 cases with a one year follow up. *Ann Rheum Dis* 2005;64(5):760-4. doi: 10.1136/ard.2004.021188 [published Online First: 2005/04/19]
17. Ketola S, Lehtinen J, Arnala I, et al. Does arthroscopic acromioplasty provide any additional value in the treatment of shoulder impingement syndrome?: a two-year randomised controlled trial. *J Bone Joint Surg Br* 2009;91(10):1326-34. doi: 10.1302/0301-620X.91B10.22094 [published Online First: 2009/10/02]
18. Beard DJ, Rees JL, Cook JA, et al. Arthroscopic subacromial decompression for subacromial shoulder pain (CSAW): a multicentre, pragmatic, parallel group, placebo-controlled, three-group, randomised surgical trial. *The Lancet* 2017 doi: 10.1016/s0140-6736(17)32457-1

- 1  
2  
3 456 19. Paavola M, Malmivaara A, Taimela S, et al. Subacromial decompression versus diagnostic  
4 457 arthroscopy for shoulder impingement: randomised, placebo surgery controlled clinical trial.  
5 458 *Bmj-Brit Med J* 2018;362 doi: 10.1136/bmj.k2860  
6  
7 459 20. Karjalainen TV, Jain NB, Page CM, et al. Subacromial decompression surgery for rotator cuff  
8 460 disease. *Cochrane Db Syst Rev* 2019(1) doi: 10.1002/14651858.CD005619.pub3  
9 461 21. Vandvik PO, Lähdeoja T, Arden C, et al. Subacromial decompression surgery for adults with  
10 462 shoulder pain: a clinical practice guideline. *BMJ* 2019;364:l294. doi: 10.1136/bmj.l294  
11 463 22. Health and Social Care Information Centre. Hospital Episode Statistics (HES) Analysis Guide, 2015.  
12 464 23. Herbert A, Wijlaars L, Zylbersztejn A, et al. Data Resource Profile: Hospital Episode Statistics  
13 465 Admitted Patient Care (HES APC). *Int J Epidemiol* 2017;46(4):1093+. doi: 10.1093/ije/dyx015  
14 466 24. NHS Digital. Lower Layer Super Output Area [Available from:  
15 467 [https://www.datadictionary.nhs.uk/data\\_dictionary/nhs\\_business\\_definitions/l/lower\\_layer](https://www.datadictionary.nhs.uk/data_dictionary/nhs_business_definitions/l/lower_layer_super_output_area_de.asp?shownav=1)  
16 468 [super\\_output\\_area\\_de.asp?shownav=1](https://www.datadictionary.nhs.uk/data_dictionary/nhs_business_definitions/l/lower_layer_super_output_area_de.asp?shownav=1) accessed 14 May 2018.  
17 469 25. Standardization: a classic epidemiological method for the comparison of rates. *Epidemiol Bull*  
18 470 2002;23(3):9-12. [published Online First: 2003/03/01]  
19 471 26. Anon. Standardization: a classic epidemiological method for the comparison of rates.  
20 472 *Epidemiological Bulletin* 2002;23(3):9-12.  
21 473 27. Department of Health. Payment by Results National Tariffs 2016/17 2016 [Available from:  
22 474 <https://www.gov.uk/government/publications/nhs-national-tariff-payment-system-201617>  
23 475 accessed 30 November 2017.  
24 476 28. Department of Health. Payment by Results Enhanced Tariff Option 2015/16 2015 [Available  
25 477 from:  
26 478 [http://webarchive.nationalarchives.gov.uk/20161103233943/https://www.england.nhs.uk/r](http://webarchive.nationalarchives.gov.uk/20161103233943/https://www.england.nhs.uk/resources/pay-syst/tariff-guide/)  
27 479 [esources/pay-syst/tariff-guide/](http://webarchive.nationalarchives.gov.uk/20161103233943/https://www.england.nhs.uk/resources/pay-syst/tariff-guide/) accessed 30 November 2017.  
28 480 29. Department of Health. Payment by Results National Tariffs 2014/15 2014 [Available from:  
29 481 [https://www.gov.uk/government/publications/national-tariff-payment-system-2014-to-](https://www.gov.uk/government/publications/national-tariff-payment-system-2014-to-2015)  
30 482 [2015](https://www.gov.uk/government/publications/national-tariff-payment-system-2014-to-2015) accessed 30 November 2017.  
31 483 30. Department of Health. Payment by Results National Tariffs 2013/14 2013 [Available from:  
32 484 [https://www.gov.uk/government/publications/payment-by-results-pbr-operational-](https://www.gov.uk/government/publications/payment-by-results-pbr-operational-guidance-and-tariffs)  
33 485 [guidance-and-tariffs](https://www.gov.uk/government/publications/payment-by-results-pbr-operational-guidance-and-tariffs) accessed 30 November 2017.  
34 486 31. Department of Health. Payment by Results National Tariffs 2012/13 2012 [Available from:  
35 487 [https://www.gov.uk/government/publications/confirmation-of-payment-by-results-pbr-](https://www.gov.uk/government/publications/confirmation-of-payment-by-results-pbr-arrangements-for-2012-13)  
36 488 [arrangements-for-2012-13](https://www.gov.uk/government/publications/confirmation-of-payment-by-results-pbr-arrangements-for-2012-13) accessed 30 November 2017.  
37 489 32. Department of Health. Payment by Results National Tariffs 2011/12 2011 [Available from:  
38 490 [http://webarchive.nationalarchives.gov.uk/20130507170152/https://www.gov.uk/governm](http://webarchive.nationalarchives.gov.uk/20130507170152/https://www.gov.uk/government/publications/confirmation-of-payment-by-results-pbr-arrangements-for-2011-12)  
39 491 [ent/publications/confirmation-of-payment-by-results-pbr-arrangements-](http://webarchive.nationalarchives.gov.uk/20130507170152/https://www.gov.uk/government/publications/confirmation-of-payment-by-results-pbr-arrangements-for-2011-12) for-2011-12  
40 492 accessed 30 November 2017.  
41 493 33. Department of Health. Payment by Results National Tariffs 2010/11 2010 [Available from:  
42 494 <https://data.gov.uk/dataset/payment-by-results-2010-11-national-tariff-information>  
43 495 accessed 30 November 2017.  
44 496 34. Department of Health. Payment by Results National Tariffs 2009/10 2009 [Available from:  
45 497 [http://webarchive.nationalarchives.gov.uk/+http://www.dh.gov.uk/en/Publicationsandstat](http://webarchive.nationalarchives.gov.uk/+http://www.dh.gov.uk/en/Publicationsandstatistics/Publications/PublicationsPolicyAndGuidance/DH_094091)  
46 498 [istics/Publications/PublicationsPolicyAndGuidance/DH\\_094091](http://webarchive.nationalarchives.gov.uk/+http://www.dh.gov.uk/en/Publicationsandstatistics/Publications/PublicationsPolicyAndGuidance/DH_094091) accessed 30 November  
47 499 2017.  
48 500 35. Department of Health. Payment by Results National Tariffs 2008/09 2008 [Available from:  
49 501 [http://webarchive.nationalarchives.gov.uk/+http://www.dh.gov.uk/en/Managingyourorga](http://webarchive.nationalarchives.gov.uk/+http://www.dh.gov.uk/en/Managingyourorganisation/Financeandplanning/NHSFinancialReforms/DH_081238)  
50 502 [nisation/Financeandplanning/NHSFinancialReforms/DH\\_081238](http://webarchive.nationalarchives.gov.uk/+http://www.dh.gov.uk/en/Managingyourorganisation/Financeandplanning/NHSFinancialReforms/DH_081238) accessed 30 November  
51 503 2017.  
52 504 36. Department of Health. Payment by Results National Tariffs 2007/08 2007 [Available from:  
53 505 [http://webarchive.nationalarchives.gov.uk/+http://www.dh.gov.uk/en/Publicationsandstat](http://webarchive.nationalarchives.gov.uk/+http://www.dh.gov.uk/en/Publicationsandstatistics/Publications/PublicationsPolicyAndGuidance/DH_074091)

1  
2  
3  
4  
5  
6  
7  
8  
9  
10  
11  
12  
13  
14  
15  
16  
17  
18  
19  
20  
21  
22  
23  
24  
25  
26  
27  
28  
29  
30  
31  
32  
33  
34  
35  
36  
37  
38  
39  
40  
41  
42  
43  
44  
45  
46  
47  
48  
49  
50  
51  
52  
53  
54  
55  
56  
57  
58  
59  
60

- 506 [istics/Publications/PublicationsPolicyAndGuidance/DH\\_062914](#) accessed 30 November  
507 2017.
- 508 37. Kirkwood BR, Sterne JA. Rate Ratios. Essential Medical Statistics. Oxford, UK: Blackwell Science  
509 Ltd 2003:241-42.
- 510 38. Thorpe A, Hurworth M, O'Sullivan P, et al. Rising trends in surgery for rotator cuff disease in  
511 Western Australia. *Anz J Surg* 2016;86(10):801-04. doi: 10.1111/ans.13691
- 512 39. Iyengar JJ, Samagh SP, Schairer W, et al. Current Trends in Rotator Cuff Repair: Surgical  
513 Technique, Setting, and Cost. *Arthroscopy* 2014;30(3):284-88. doi:  
514 10.1016/j.arthro.2013.11.018
- 515 40. Paloneva J, Lepola V, Karppinen J, et al. Declining incidence of acromioplasty in Finland. *Acta*  
516 *Orthop* 2015;86(2):220-24. doi: 10.3109/17453674.2014.977703
- 517 41. Vitale MA, Arons RR, Hurwitz S, et al. The Rising Incidence of Acromioplasty. *J Bone Joint Surg Am*  
518 2010;92a(9):1842-50. doi: 10.2106/Jbjs.I.01003
- 519 42. Wartolowska K, Beard DJ, Carr AJ. Attitudes and Beliefs about Placebo Surgery among  
520 Orthopedic Shoulder Surgeons in the United Kingdom. *Plos One* 2014;9(3) doi:  
521 10.1371/journal.pone.0091699
- 522 43. Carr A, Cooper C, Campbell MK, et al. Effectiveness of open and arthroscopic rotator cuff repair  
523 (UKUFF) A RANDOMISED CONTROLLED TRIAL. *Bone Joint J* 2017;99b(1):107-15. doi:  
524 10.1302/0301-620x.99b1.Bjj-2016-0424.R1
- 525 44. Cook JA, Ramsay CR, Norrie J. Recruitment to publicly funded trials - Are surgical trials really  
526 different? *Contemp Clin Trials* 2008;29(5):631-34. doi: 10.1016/j.cct.2008.02.005
- 527 45. Rooshenas L, Scott LJ, Blazeby JM, et al. The Quintet Recruitment Intervention supported five  
528 randomized trials to recruit to target: a mixed-methods evaluation 2018 [Available from:  
529 <https://doi.org/10.1016/j.jclinepi.2018.10.004>].
- 530 46. Donovan JL, Rooshenas L, Jepson M, et al. Optimising recruitment and informed consent in  
531 randomised controlled trials: the development and implementation of the Quintet  
532 Recruitment Intervention (QRI). *Trials* 2016;17 doi: 10.1186/s13063-016-1391-4
- 533 47. Hirst A, Philippou Y, Blazeby J, et al. No Surgical Innovation Without Evaluation: Evolution and  
534 Further Development of the IDEAL Framework and Recommendations. *Annals of Surgery*  
535 2018 doi: 10.1097/SLA.0000000000002794
- 536 48. National Institute for Health and Care Excellence. Shoulder Pain, 2017.
- 537 49. The Royal College of Surgeons of England. Commissioning guide: Subacromial shoulder pain,  
538 2014.
- 539 50. Iacobucci G. Pressure on NHS finances drives new wave of postcode rationing. *Bmj-Brit Med J*  
540 2017;358 doi: 10.1136/bmj.j3190
- 541 51. Wennberg JE, Barnes BA, Zubkoff M. Professional Uncertainty and the Problem of Supplier-  
542 Induced Demand. *Soc Sci Med* 1982;16(7):811-24. doi: Doi 10.1016/0277-9536(82)90234-9
- 543 52. Hollingworth W, Rooshenas L, Busby J, et al. Using clinical practice variations as a method for  
544 commissioners and clinicians to identify and prioritise opportunities for disinvestment in  
545 health care: a cross-sectional study, systematic reviews and qualitative study. *Health*  
546 *Services and Delivery Research* 2015 doi: 10.3310/hsdr03130
- 547 53. Rooshenas L, Owen-Smith A, Hollingworth W, et al. "I won't call it rationing ...": An ethnographic  
548 study of healthcare disinvestment in theory and practice. *Soc Sci Med* 2015;128:273-81. doi:  
549 10.1016/j.socscimed.2015.01.020
- 550 54. Hamdy FC, Donovan JL, Lane JA, et al. 10-Year Outcomes after Monitoring, Surgery, or  
551 Radiotherapy for Localized Prostate Cancer. *New Engl J Med* 2016;375(15):1415-24. doi:  
552 10.1056/NEJMoa1606220
- 553 55. Rubie I, Houghton C, O'Hara J, et al. The NATional randomised controlled Trial of Tonsillectomy IN  
554 Adults (NATTINA): a clinical and cost-effectiveness study: study protocol for a randomised  
555 control trial. *Trials* 2015;16 doi: 10.1186/s13063-015-0768-0

- 1  
2  
3 556 56. National Institute for Health Research. 18/109 Management of Partial Thickness Rotator-Cuff  
4 557 Tears 2018 [Available from: [https://www.nihr.ac.uk/funding-and-support/funding-  
6 559 opportunities/18109-management-of-partial-thickness-rotator-cuff-tears/89052018](https://www.nihr.ac.uk/funding-and-support/funding-<br/>5 558 opportunities/18109-management-of-partial-thickness-rotator-cuff-tears/89052018).  
7 560 57. Belluz J. Thousands of heart patients get stents that may do more harm than good: Vox; 2017  
8 561 [Available from: [https://www.vox.com/science-and-health/2017/11/3/16599072/stent-  
10 562 chest-pain-treatment-angina-not-effective](https://www.vox.com/science-and-health/2017/11/3/16599072/stent-<br/>9 562 chest-pain-treatment-angina-not-effective).  
11 563 58. Al-Lamee R, Thompson D, Dehbi HM, et al. Percutaneous coronary intervention in stable angina  
12 564 (ORBITA): a double-blind, randomised controlled trial. *Lancet* 2018;391(10115):31-40. doi:  
13 565 10.1016/S0140-6736(17)32714-9  
14 566 59. Epstein D. When evidence says no, but doctors say yes: ProPublica; 2017 [Available from:  
15 567 [https://web.archive.org/web/20170316151510/https://www.propublica.org/article/when-  
17 568 evidence-says-no-but-doctors-say-yes2018](https://web.archive.org/web/20170316151510/https://www.propublica.org/article/when-<br/>16 568 evidence-says-no-but-doctors-say-yes2018).  
18 569 60. Katz JN, Brophy RH, Chaisson CE, et al. Surgery versus Physical Therapy for a Meniscal Tear and  
19 570 Osteoarthritis. *New Engl J Med* 2013;368(18):1675-84. doi: 10.1056/NEJMoa1301408  
20 571 61. Sihvonen R, Paavola M, Malmivaara A, et al. Arthroscopic Partial Meniscectomy versus Sham  
21 572 Surgery for a Degenerative Meniscal Tear. *New Engl J Med* 2013;369(26):2515-24. doi:  
22 10.1056/NEJMoa1305189  
23  
24  
25  
26  
27  
28  
29  
30  
31  
32  
33  
34  
35  
36  
37  
38  
39  
40  
41  
42  
43  
44  
45  
46  
47  
48  
49  
50  
51  
52  
53  
54  
55  
56  
57  
58  
59  
60

**FIGURE CAPTIONS**

Figure 1. ICD-10 and OPCS-4 codes used to define subacromial decompression<sup>13</sup>

Figure 2. Directly standardised rates (per 100,000 people) of subacromial decompression in England, Finland, New York State USA, Florida State USA, and Western Australia

Notes for Figure 2. England data prior to 2007 is taken from Judge et al.<sup>13</sup>; New York State data is for subacromial decompression with or without rotator cuff repair, whilst data for Florida State, Finland and Western Australia is for subacromial decompression alone<sup>38-41</sup>

Figure 3. Indirectly standardised rates of subacromial decompression by CCG in England, 2016/17

For peer review only

| <i>Any of these <b>diagnosis</b> codes in any position</i> |                        | <i>Any of these <b>procedure</b> codes in any position</i>                       |
|------------------------------------------------------------|------------------------|----------------------------------------------------------------------------------|
| M75.1 Rotator cuff syndrome                                | In combination with... | W84.8 Other specified therapeutic endoscopic operations on other joint structure |
| M75.3 Calcific tendinitis of shoulder                      |                        | Y52.8 Other specified approach to organ through other opening                    |
| M75.4 Impingement syndrome of shoulder                     |                        | Y76.7 Arthroscopic approach to joint                                             |
| M75.5 Bursitis of shoulder                                 |                        | W84.4 Endoscopic decompression of joint                                          |

OR

| <i>This <b>procedure</b> code in any position</i> |
|---------------------------------------------------|
| O29.1 Subacromial decompression                   |

Figure 1. ICD-10 and OPCS-4 codes used to define subacromial decompression<sup>13</sup>

102x65mm (300 x 300 DPI)



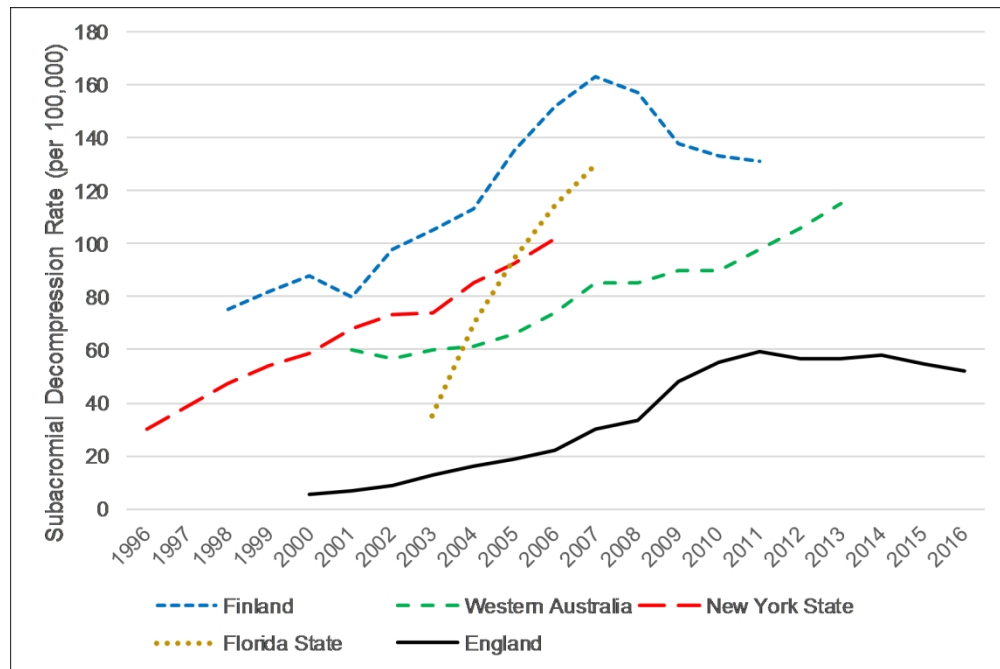

Figure 2. Directly standardised rates (per 100,000 people) of subacromial decompression in England, Finland, New York State USA, Florida State USA, and Western Australia. Notes for Figure 2. England data prior to 2007 is taken from Judge et al.<sup>13</sup>; New York State data is for subacromial decompression with or without rotator cuff repair, whilst data for Florida State, Finland and Western Australia is for subacromial decompression alone.<sup>34-37</sup>

150x99mm (300 x 300 DPI)

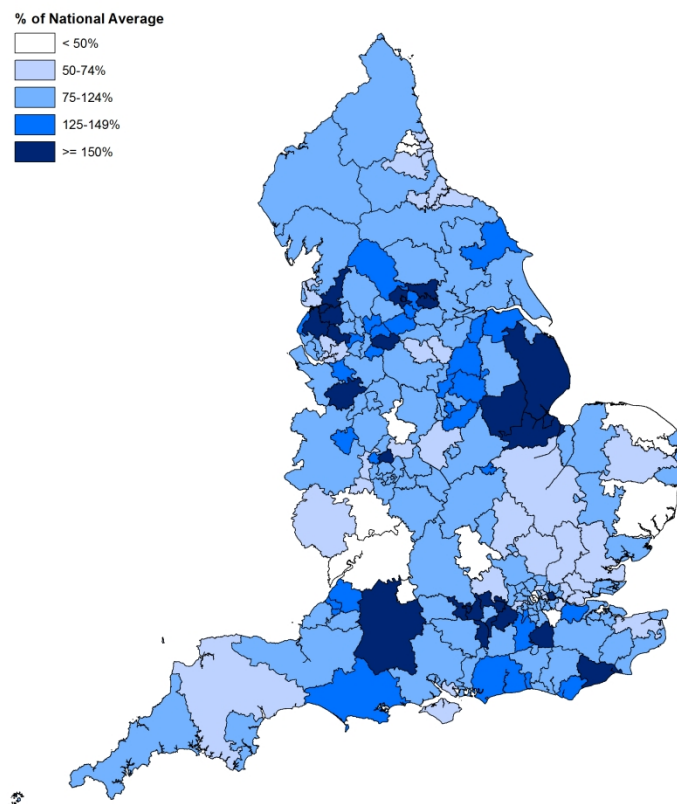

Figure 3. Indirectly standardised rates of subacromial decompression by CCG in England, 2016/17

210x296mm (300 x 300 DPI)

## APPENDIX A: METHODOLOGICAL DETAILS

### Estimating Procedure Rates

National trends over time were estimated using directly standardised procedure rates<sup>1</sup> (per 100,000 population), with the population of England in 2016 as our standard population. We first summed the number of shoulder procedures, grouped by sex, quintiles of age, and financial year. These procedure counts were used to calculate annual age-sex-specific rates, by dividing by the appropriate age-sex-specific mid-year populations of England<sup>2</sup> (e.g. for the 2012/13 financial year, the mid-2012 populations were used). We weighted the annual age-sex-specific rates according to the population distribution of England in 2016, to produce directly standardised rates for each year. The standardised rates for 2016/17 are the same as the crude rates.

For comparison of smaller areas, we estimated indirectly standardised rates<sup>3</sup> per 100,000 population. We first calculated age-sex-specific rates for England in 2016/17, then multiplied these rates by the age-sex-specific population for the area of interest<sup>2,4,5</sup> (e.g. CCG) and summed the results. This produced the expected number of patients and procedures for that area, if it were to have the same age-sex-specific rates as England. The expected number was then compared to the observed number of patients and procedures for that area. A Poisson regression model was fitted to the observed counts for each year, with the expected counts as an offset and socio-economic deprivation (using the overall score from the English Indices of Multiple Deprivation<sup>6</sup>) and ethnicity (% white British<sup>7</sup>) as predictive factors. The model was then used to predict new expected counts for each area based on deprivation and ethnicity, and form indirectly standardised procedure ratios (observed / expected).

## Estimating Procedure Costs

Costs were estimated for each financial year by linking HRG codes for each admission in HES with the Department of Health Payment by Results National Tariffs for the appropriate financial year.<sup>8-17</sup>

Enhanced Tariff Option (ETO) tariffs were applied for 2015/16 as, following a dispute, 88% of providers agreed to use ETO tariffs for that financial year.<sup>18</sup> The National Tariffs provide costs for day cases and longer stays, for both elective and non-elective admissions. They also provide additional daily costs for admissions that go above a threshold number of days (termed excess bed days), which varies for different types of admission. To calculate the cost of admission, we excluded admissions without a discharge date (used to calculate number of bed days) or without a HRG code that matched to the National Tariffs (0.7% excluded). We then applied the relevant national tariff or alternatively the best practice tariff where applicable (only for HRG code HB62C under specified circumstances) and added excess bed day costs (if there were any). Following this, the special service top-up for orthopaedic procedures was applied for each year.

## References

1. Standardization: a classic epidemiological method for the comparison of rates. *Epidemiol Bull* 2002;23(3):9-12. [published Online First: 2003/03/01]
2. Office for National Statistics. Lower Super Output Area Mid-Year Population Estimates [Available from: <https://www.ons.gov.uk/peoplepopulationandcommunity/populationandmigration/populationestimates/datasets/lowersuperoutputareamidyearpopulationestimates> accessed 30 November 2017.
3. Anon. Standardization: a classic epidemiological method for the comparison of rates. *Epidemiological Bulletin* 2002;23(3):9-12.
4. Office for National Statistics. Lower Layer Super Output Area (2011) to Clinical Commissioning Group to Local Authority District (July 2015) Lookup in England: Office for National Statistics; [Available from: <http://ons.maps.arcgis.com/home/item.html?id=7de88cd2369d4006925de49e8f3f2e272016>.
5. Office for National Statistics. Output Area to Lower Layer Super Output Area to Middle Layer Super Output Area to Local Authority District (December 2011) Lookup in England and Wales [Available from: <http://ons.maps.arcgis.com/home/item.html?id=baf6566ca08949c6bbd61ff81d9526da2016>

- 1
  - 2
  - 3
  - 4
  - 5
  - 6
  - 7
  - 8
  - 9
  - 10
  - 11
  - 12
  - 13
  - 14
  - 15
  - 16
  - 17
  - 18
  - 19
  - 20
  - 21
  - 22
  - 23
  - 24
  - 25
  - 26
  - 27
  - 28
  - 29
  - 30
  - 31
  - 32
  - 33
  - 34
  - 35
  - 36
  - 37
  - 38
  - 39
  - 40
  - 41
  - 42
  - 43
  - 44
  - 45
  - 46
  - 47
  - 48
  - 49
  - 50
  - 51
  - 52
  - 53
  - 54
  - 55
  - 56
  - 57
  - 58
  - 59
  - 60
6. Government DoCaL. English Indices of Deprivation 2015 [Available from: <https://www.gov.uk/government/statistics/english-indices-of-deprivation-20152016>.
7. Nomis; Office for National Statistics. Ethnic group of the usual resident population of England and Wales as at census day, 27 March 2011 [Available from: <https://www.nomisweb.co.uk/census/2011/ks201ew2016>.
8. Department of Health. Payment by Results National Tariffs 2016/17 2016 [Available from: <https://www.gov.uk/government/publications/nhs-national-tariff-payment-system-201617> accessed 30 November 2017.
9. Department of Health. Payment by Results Enhanced Tariff Option 2015/16 2015 [Available from: <http://webarchive.nationalarchives.gov.uk/20161103233943/https://www.england.nhs.uk/resources/pay-syst/tariff-guide/> accessed 30 November 2017.
10. Department of Health. Payment by Results National Tariffs 2014/15 2014 [Available from: <https://www.gov.uk/government/publications/national-tariff-payment-system-2014-to-2015> accessed 30 November 2017.
11. Department of Health. Payment by Results National Tariffs 2013/14 2013 [Available from: <https://www.gov.uk/government/publications/payment-by-results-pbr-operational-guidance-and-tariffs> accessed 30 November 2017.
12. Department of Health. Payment by Results National Tariffs 2012/13 2012 [Available from: <https://www.gov.uk/government/publications/confirmation-of-payment-by-results-pbr-arrangements-for-2012-13> accessed 30 November 2017.
13. Department of Health. Payment by Results National Tariffs 2011/12 2011 [Available from: <http://webarchive.nationalarchives.gov.uk/20130507170152/https://www.gov.uk/government/publications/confirmation-of-payment-by-results-pbr-arrangements-for-2011-12> accessed 30 November 2017.
14. Department of Health. Payment by Results National Tariffs 2010/11 2010 [Available from: <https://data.gov.uk/dataset/payment-by-results-2010-11-national-tariff-information> accessed 30 November 2017.
15. Department of Health. Payment by Results National Tariffs 2009/10 2009 [Available from: [http://webarchive.nationalarchives.gov.uk/+http://www.dh.gov.uk/en/Publicationsandstatistics/Publications/PublicationsPolicyAndGuidance/DH\\_094091](http://webarchive.nationalarchives.gov.uk/+http://www.dh.gov.uk/en/Publicationsandstatistics/Publications/PublicationsPolicyAndGuidance/DH_094091) accessed 30 November 2017.
16. Department of Health. Payment by Results National Tariffs 2008/09 2008 [Available from: [http://webarchive.nationalarchives.gov.uk/+http://www.dh.gov.uk/en/Managingyourorganisation/Financeandplanning/NHSFinancialReforms/DH\\_081238](http://webarchive.nationalarchives.gov.uk/+http://www.dh.gov.uk/en/Managingyourorganisation/Financeandplanning/NHSFinancialReforms/DH_081238) accessed 30 November 2017.
17. Department of Health. Payment by Results National Tariffs 2007/08 2007 [Available from: [http://webarchive.nationalarchives.gov.uk/+http://www.dh.gov.uk/en/Publicationsandstatistics/Publications/PublicationsPolicyAndGuidance/DH\\_062914](http://webarchive.nationalarchives.gov.uk/+http://www.dh.gov.uk/en/Publicationsandstatistics/Publications/PublicationsPolicyAndGuidance/DH_062914) accessed 30 November 2017.
18. Grasic K, Mason AR, Street A. Paying for the quantity and quality of hospital care: the foundations and evolution of payment policy in England. *Health Econ Rev* 2015;5 doi: 10.1186/s13561-015-0050-x

**The RECORD statement – checklist of items, extended from the STROBE statement, that should be reported in observational studies using routinely collected health data.**

|                           | Item No. | STROBE items                                                                                                                                                                               | Location in manuscript where items are reported | RECORD items                                                                                                                                                                                                                                                                                                                                                                                                                                | Location in manuscript where items are reported |
|---------------------------|----------|--------------------------------------------------------------------------------------------------------------------------------------------------------------------------------------------|-------------------------------------------------|---------------------------------------------------------------------------------------------------------------------------------------------------------------------------------------------------------------------------------------------------------------------------------------------------------------------------------------------------------------------------------------------------------------------------------------------|-------------------------------------------------|
| <b>Title and abstract</b> |          |                                                                                                                                                                                            |                                                 |                                                                                                                                                                                                                                                                                                                                                                                                                                             |                                                 |
|                           | 1        | (a) Indicate the study's design with a commonly used term in the title or the abstract (b) Provide in the abstract an informative and balanced summary of what was done and what was found |                                                 | RECORD 1.1: The type of data used should be specified in the title or abstract. When possible, the name of the databases used should be included.<br><br>RECORD 1.2: If applicable, the geographic region and timeframe within which the study took place should be reported in the title or abstract.<br><br>RECORD 1.3: If linkage between databases was conducted for the study, this should be clearly stated in the title or abstract. | 40, 41<br><br>37, 40, 41, 42<br><br>40, 41      |
| <b>Introduction</b>       |          |                                                                                                                                                                                            |                                                 |                                                                                                                                                                                                                                                                                                                                                                                                                                             |                                                 |
| Background rationale      | 2        | Explain the scientific background and rationale for the investigation being reported                                                                                                       |                                                 |                                                                                                                                                                                                                                                                                                                                                                                                                                             | 77-115                                          |
| Objectives                | 3        | State specific objectives, including any prespecified hypotheses                                                                                                                           |                                                 |                                                                                                                                                                                                                                                                                                                                                                                                                                             | 116-120                                         |
| <b>Methods</b>            |          |                                                                                                                                                                                            |                                                 |                                                                                                                                                                                                                                                                                                                                                                                                                                             |                                                 |
| Study Design              | 4        | Present key elements of study design early in the paper                                                                                                                                    |                                                 |                                                                                                                                                                                                                                                                                                                                                                                                                                             | 126-163                                         |
| Setting                   | 5        | Describe the setting, locations, and relevant dates, including periods of recruitment, exposure, follow-up, and data collection                                                            |                                                 |                                                                                                                                                                                                                                                                                                                                                                                                                                             | 127-142                                         |

|                                                                                                                                                                                                            |          |                                                                                                                                                                                                                                                                                                                                                                                                                                                                                                                                                                                                                                                                                                                        |  |                                                                                                                                                                                                                                                                                                                                                                                                                                                                                                                                                                                                                                                                                                      |                                                                                                                                                                                                                   |
|------------------------------------------------------------------------------------------------------------------------------------------------------------------------------------------------------------|----------|------------------------------------------------------------------------------------------------------------------------------------------------------------------------------------------------------------------------------------------------------------------------------------------------------------------------------------------------------------------------------------------------------------------------------------------------------------------------------------------------------------------------------------------------------------------------------------------------------------------------------------------------------------------------------------------------------------------------|--|------------------------------------------------------------------------------------------------------------------------------------------------------------------------------------------------------------------------------------------------------------------------------------------------------------------------------------------------------------------------------------------------------------------------------------------------------------------------------------------------------------------------------------------------------------------------------------------------------------------------------------------------------------------------------------------------------|-------------------------------------------------------------------------------------------------------------------------------------------------------------------------------------------------------------------|
| <p>1<br/>2<br/>3<br/>4<br/>5<br/>6<br/>7<br/>8<br/>9<br/>10<br/>11<br/>12<br/>13<br/>14<br/>15<br/>16<br/>17<br/>18<br/>19<br/>20<br/>21<br/>22<br/>23<br/>24<br/>25<br/>26<br/>27</p> <p>Participants</p> | <p>6</p> | <p>(a) <i>Cohort study</i> - Give the eligibility criteria, and the sources and methods of selection of participants. Describe methods of follow-up<br/> <i>Case-control study</i> - Give the eligibility criteria, and the sources and methods of case ascertainment and control selection. Give the rationale for the choice of cases and controls<br/> <i>Cross-sectional study</i> - Give the eligibility criteria, and the sources and methods of selection of participants</p> <p>(b) <i>Cohort study</i> - For matched studies, give matching criteria and number of exposed and unexposed<br/> <i>Case-control study</i> - For matched studies, give matching criteria and the number of controls per case</p> |  | <p>RECORD 6.1: The methods of study population selection (such as codes or algorithms used to identify subjects) should be listed in detail. If this is not possible, an explanation should be provided.</p> <p>RECORD 6.2: Any validation studies of the codes or algorithms used to select the population should be referenced. If validation was conducted for this study and not published elsewhere, detailed methods and results should be provided.</p> <p>RECORD 6.3: If the study involved linkage of databases, consider use of a flow diagram or other graphical display to demonstrate the data linkage process, including the number of individuals with linked data at each stage.</p> | <p>136-142 and Figure 1</p> <p>Previous paper using same codes referenced: 137</p> <p>Linked to payment-by-results tariffs by HRG code (150-152), more of a lookup table than a core linkage; also Appendix A</p> |
| <p>28<br/>29<br/>30<br/>31<br/>32<br/>33<br/>34</p> <p>Variables</p>                                                                                                                                       | <p>7</p> | <p>Clearly define all outcomes, exposures, predictors, potential confounders, and effect modifiers. Give diagnostic criteria, if applicable.</p>                                                                                                                                                                                                                                                                                                                                                                                                                                                                                                                                                                       |  | <p>RECORD 7.1: A complete list of codes and algorithms used to classify exposures, outcomes, confounders, and effect modifiers should be provided. If these cannot be reported, an explanation should be provided.</p>                                                                                                                                                                                                                                                                                                                                                                                                                                                                               | <p>136-142 and Figure 1</p>                                                                                                                                                                                       |
| <p>35<br/>36<br/>37<br/>38<br/>39<br/>40<br/>41<br/>42</p> <p>Data sources/<br/>measurement</p>                                                                                                            | <p>8</p> | <p>For each variable of interest, give sources of data and details of methods of assessment (measurement). Describe comparability of assessment methods if there is more than one group</p>                                                                                                                                                                                                                                                                                                                                                                                                                                                                                                                            |  |                                                                                                                                                                                                                                                                                                                                                                                                                                                                                                                                                                                                                                                                                                      | <p>136-152</p>                                                                                                                                                                                                    |

|                                                                                                                                                    |                                  |    |                                                                                                                                                                                                                                                                                                                                                                                                                                                                                                                                                                      |                                                                                                                                                       |                             |
|----------------------------------------------------------------------------------------------------------------------------------------------------|----------------------------------|----|----------------------------------------------------------------------------------------------------------------------------------------------------------------------------------------------------------------------------------------------------------------------------------------------------------------------------------------------------------------------------------------------------------------------------------------------------------------------------------------------------------------------------------------------------------------------|-------------------------------------------------------------------------------------------------------------------------------------------------------|-----------------------------|
| 1<br>2<br>3<br>4                                                                                                                                   | Bias                             | 9  | Describe any efforts to address potential sources of bias                                                                                                                                                                                                                                                                                                                                                                                                                                                                                                            |                                                                                                                                                       | 136-148;<br>standardisation |
| 5<br>6<br>7<br>8<br>9                                                                                                                              | Study size                       | 10 | Explain how the study size was arrived at                                                                                                                                                                                                                                                                                                                                                                                                                                                                                                                            |                                                                                                                                                       | 136-142, 170-173            |
| 10<br>11<br>12<br>13<br>14<br>15<br>16<br>17<br>18<br>19<br>20<br>21<br>22<br>23<br>24<br>25<br>26<br>27<br>28<br>29<br>30<br>31<br>32<br>33<br>34 | Quantitative variables           | 11 | Explain how quantitative variables were handled in the analyses. If applicable, describe which groupings were chosen, and why                                                                                                                                                                                                                                                                                                                                                                                                                                        |                                                                                                                                                       | 143-160                     |
| 35<br>36<br>37<br>38<br>39<br>40<br>41<br>42<br>43<br>44                                                                                           | Statistical methods              | 12 | (a) Describe all statistical methods, including those used to control for confounding<br>(b) Describe any methods used to examine subgroups and interactions<br>(c) Explain how missing data were addressed<br>(d) <i>Cohort study</i> - If applicable, explain how loss to follow-up was addressed<br><i>Case-control study</i> - If applicable, explain how matching of cases and controls was addressed<br><i>Cross-sectional study</i> - If applicable, describe analytical methods taking account of sampling strategy<br>(e) Describe any sensitivity analyses |                                                                                                                                                       | 143-160                     |
| 45<br>46<br>47                                                                                                                                     | Data access and cleaning methods |    | ..                                                                                                                                                                                                                                                                                                                                                                                                                                                                                                                                                                   | RECORD 12.1: Authors should describe the extent to which the investigators had access to the database population used to create the study population. | 366-370                     |



|                  |    |                                                                                                                                                                                                                                                                                                                                                 |  |                                                                                                                                                                                                                                                                                                                    |                                                                                                                         |
|------------------|----|-------------------------------------------------------------------------------------------------------------------------------------------------------------------------------------------------------------------------------------------------------------------------------------------------------------------------------------------------|--|--------------------------------------------------------------------------------------------------------------------------------------------------------------------------------------------------------------------------------------------------------------------------------------------------------------------|-------------------------------------------------------------------------------------------------------------------------|
|                  |    |                                                                                                                                                                                                                                                                                                                                                 |  | RECORD 12.2: Authors should provide information on the data cleaning methods used in the study.                                                                                                                                                                                                                    | 136-142                                                                                                                 |
| Linkage          |    | ..                                                                                                                                                                                                                                                                                                                                              |  | RECORD 12.3: State whether the study included person-level, institutional-level, or other data linkage across two or more databases. The methods of linkage and methods of linkage quality evaluation should be provided.                                                                                          | Linked to payment-by-results tariffs by HRG code (150-152), more of a lookup table than a core linkage; also Appendix A |
| <b>Results</b>   |    |                                                                                                                                                                                                                                                                                                                                                 |  |                                                                                                                                                                                                                                                                                                                    |                                                                                                                         |
| Participants     | 13 | (a) Report the numbers of individuals at each stage of the study ( <i>e.g.</i> , numbers potentially eligible, examined for eligibility, confirmed eligible, included in the study, completing follow-up, and analysed)<br>(b) Give reasons for non-participation at each stage.<br>(c) Consider use of a flow diagram                          |  | RECORD 13.1: Describe in detail the selection of the persons included in the study ( <i>i.e.</i> , study population selection) including filtering based on data quality, data availability and linkage. The selection of included persons can be described in the text and/or by means of the study flow diagram. | 170-179, Table 1, Appendix A                                                                                            |
| Descriptive data | 14 | (a) Give characteristics of study participants ( <i>e.g.</i> , demographic, clinical, social) and information on exposures and potential confounders<br>(b) Indicate the number of participants with missing data for each variable of interest<br>(c) <i>Cohort study</i> - summarise follow-up time ( <i>e.g.</i> , average and total amount) |  |                                                                                                                                                                                                                                                                                                                    | Table 1, 181-182                                                                                                        |
| Outcome data     | 15 | <i>Cohort study</i> - Report numbers of outcome events or summary measures over time                                                                                                                                                                                                                                                            |  |                                                                                                                                                                                                                                                                                                                    | 170-179                                                                                                                 |

|                   |    |                                                                                                                                                                                                                                                                                                                                                                                                                                |  |                                                                                                                                                                                                                                                                                                          |         |
|-------------------|----|--------------------------------------------------------------------------------------------------------------------------------------------------------------------------------------------------------------------------------------------------------------------------------------------------------------------------------------------------------------------------------------------------------------------------------|--|----------------------------------------------------------------------------------------------------------------------------------------------------------------------------------------------------------------------------------------------------------------------------------------------------------|---------|
|                   |    | <p><i>Case-control study</i> - Report numbers in each exposure category, or summary measures of exposure</p> <p><i>Cross-sectional study</i> - Report numbers of outcome events or summary measures</p>                                                                                                                                                                                                                        |  |                                                                                                                                                                                                                                                                                                          |         |
| Main results      | 16 | <p>(a) Give unadjusted estimates and, if applicable, confounder-adjusted estimates and their precision (e.g., 95% confidence interval). Make clear which confounders were adjusted for and why they were included</p> <p>(b) Report category boundaries when continuous variables were categorized</p> <p>(c) If relevant, consider translating estimates of relative risk into absolute risk for a meaningful time period</p> |  |                                                                                                                                                                                                                                                                                                          | 170-200 |
| Other analyses    | 17 | Report other analyses done—e.g., analyses of subgroups and interactions, and sensitivity analyses                                                                                                                                                                                                                                                                                                                              |  |                                                                                                                                                                                                                                                                                                          | 204-218 |
| <b>Discussion</b> |    |                                                                                                                                                                                                                                                                                                                                                                                                                                |  |                                                                                                                                                                                                                                                                                                          |         |
| Key results       | 18 | Summarise key results with reference to study objectives                                                                                                                                                                                                                                                                                                                                                                       |  |                                                                                                                                                                                                                                                                                                          | 231-240 |
| Limitations       | 19 | Discuss limitations of the study, taking into account sources of potential bias or imprecision. Discuss both direction and magnitude of any potential bias                                                                                                                                                                                                                                                                     |  | RECORD 19.1: Discuss the implications of using data that were not created or collected to answer the specific research question(s). Include discussion of misclassification bias, unmeasured confounding, missing data, and changing eligibility over time, as they pertain to the study being reported. | 242-257 |

|                                  |                                                           |    |                                                                                                                                                                            |                                                                                                                                                          |         |
|----------------------------------|-----------------------------------------------------------|----|----------------------------------------------------------------------------------------------------------------------------------------------------------------------------|----------------------------------------------------------------------------------------------------------------------------------------------------------|---------|
| 1<br>2<br>3<br>4<br>5<br>6<br>7  | Interpretation                                            | 20 | Give a cautious overall interpretation of results considering objectives, limitations, multiplicity of analyses, results from similar studies, and other relevant evidence |                                                                                                                                                          | 259-321 |
| 8<br>9<br>10<br>11               | Generalisability                                          | 21 | Discuss the generalisability (external validity) of the study results                                                                                                      |                                                                                                                                                          | 319-321 |
| 12                               | <b>Other Information</b>                                  |    |                                                                                                                                                                            |                                                                                                                                                          |         |
| 13<br>14<br>15<br>16<br>17<br>18 | Funding                                                   | 22 | Give the source of funding and the role of the funders for the present study and, if applicable, for the original study on which the present article is based              |                                                                                                                                                          | 361-364 |
| 19<br>20<br>21<br>22<br>23<br>24 | Accessibility of protocol, raw data, and programming code |    | ..                                                                                                                                                                         | RECORD 22.1: Authors should provide information on how to access any supplemental information such as the study protocol, raw data, or programming code. | 372-377 |

\*Reference: Benchimol EI, Smeeth L, Guttman A, Harron K, Moher D, Petersen I, Sørensen HT, von Elm E, Langan SM, the RECORD Working Committee. The REporting of studies Conducted using Observational Routinely-collected health Data (RECORD) Statement. *PLoS Medicine* 2015; in press.

\*Checklist is protected under Creative Commons Attribution ([CC BY](https://creativecommons.org/licenses/by/4.0/)) license.
